# Supplementary material for: Short-term outcomes after emergency surgery for complicated peptic ulcer disease from the UK National Emergency Laparotomy Audit: a cohort study
Source: PubMed Central journal article supplement (PMC6104767; doi:10.1136/bmjopen-2018-023721), 2018-08-20
Supplement: bmjopen-2018-023721.draft_revisions.pdf [file bmjopen-2018-023721.draft_revisions.pdf]

# BMJ Open

BMJ Open is committed to open peer review. As part of this commitment we make the peer review history of every article we publish publicly available.

When an article is published we post the peer reviewers' comments and the authors' responses online. We also post the versions of the paper that were used during peer review. These are the versions that the peer review comments apply to.

The versions of the paper that follow are the versions that were submitted during the peer review process. They are not the versions of record or the final published versions. They should not be cited or distributed as the published version of this manuscript.

BMJ Open is an open access journal and the full, final, typeset and author-corrected version of record of the manuscript is available on our site with no access controls, subscription charges or pay-per-view fees (<http://bmjopen.bmj.com>).

If you have any questions on BMJ Open's open peer review process please email [info.bmjopen@bmj.com](mailto:info.bmjopen@bmj.com)

# BMJ Open

## Short-term outcomes after emergency surgery for complicated peptic ulcer disease from the National Emergency Laparotomy Audit

|                               |                                                                                                                                                                                                                                                                                                                                                                                                                                                                                                                                                                                                                                                                                                                                                                                                                                                                                                                                  |
|-------------------------------|----------------------------------------------------------------------------------------------------------------------------------------------------------------------------------------------------------------------------------------------------------------------------------------------------------------------------------------------------------------------------------------------------------------------------------------------------------------------------------------------------------------------------------------------------------------------------------------------------------------------------------------------------------------------------------------------------------------------------------------------------------------------------------------------------------------------------------------------------------------------------------------------------------------------------------|
| Journal:                      | <i>BMJ Open</i>                                                                                                                                                                                                                                                                                                                                                                                                                                                                                                                                                                                                                                                                                                                                                                                                                                                                                                                  |
| Manuscript ID                 | bmjopen-2018-023721                                                                                                                                                                                                                                                                                                                                                                                                                                                                                                                                                                                                                                                                                                                                                                                                                                                                                                              |
| Article Type:                 | Research                                                                                                                                                                                                                                                                                                                                                                                                                                                                                                                                                                                                                                                                                                                                                                                                                                                                                                                         |
| Date Submitted by the Author: | 24-Apr-2018                                                                                                                                                                                                                                                                                                                                                                                                                                                                                                                                                                                                                                                                                                                                                                                                                                                                                                                      |
| Complete List of Authors:     | Byrne, Benjamin; University of Bristol, Centre for Surgical Research, Population Health Sciences; University Hospitals Bristol NHS Foundation Trust, Department of Surgery<br>Bassett, Michael; Royal College of Anaesthetists, National Emergency Laparotomy Audit; Manchester University NHS Foundation Trust, Department of Anaesthesia<br>rogers, chris; University of Bristol, Clinical Trials and Evaluation Unit<br>Anderson, Iain; Royal College of Anaesthetists, National Emergency Laparotomy Audit; Salford Royal NHS Foundation Trust, Department of Surgery<br>Beckingham, Ian; Nottingham University Hospitals NHS Trust, Department of Surgery; Royal College of Surgeons of England, Association of Upper Gastrointestinal Surgeons<br>Blazeby, Jane; University of Bristol, Centre for Surgical Research, Population Health Sciences; University Hospitals Bristol NHS Foundation Trust, Department of Surgery |
| Keywords:                     | EPIDEMIOLOGY, Gastroduodenal disease < GASTROENTEROLOGY, Clinical audit < HEALTH SERVICES ADMINISTRATION & MANAGEMENT, Quality in health care < HEALTH SERVICES ADMINISTRATION & MANAGEMENT, SURGERY                                                                                                                                                                                                                                                                                                                                                                                                                                                                                                                                                                                                                                                                                                                             |

SCHOLARONE™  
Manuscripts

1  
2  
3 **Short-term outcomes after emergency surgery for complicated peptic ulcer disease from the**  
4  
5 **National Emergency Laparotomy Audit.**  
6  
7

8  
9 B E Byrne<sup>1</sup>, M Bassett<sup>2,3</sup>, C A Rogers<sup>4</sup>, I D Anderson<sup>2,5</sup>, I Beckingham<sup>6,7</sup>, J M Blazeby<sup>1,8</sup> for the National  
10  
11 Emergency Laparotomy Project Team and on behalf of the Association of Upper Gastrointestinal  
12  
13 Surgeons  
14

15 <sup>1</sup>Centre for Surgical Research, Population Health Sciences, Bristol Medical School, University of  
16  
17 Bristol, Bristol, UK.  
18

19 <sup>2</sup>National Emergency Laparotomy Audit, The Royal College of Anaesthetists, London, UK.  
20

21 <sup>3</sup>Department of Anaesthesia, Manchester University NHS Foundation Trust, Manchester, UK.  
22

23 <sup>4</sup>Clinical Trials and Evaluation Unit, Bristol Medical School, University of Bristol, Bristol, UK.  
24

25 <sup>5</sup>Department of Surgery, Salford Royal NHS Foundation Trust, Salford, UK.  
26  
27

28 <sup>6</sup>Department of Surgery, Nottingham University Hospitals NHS Trust, Nottingham, UK.  
29

30 <sup>7</sup>Association of Upper Gastrointestinal Surgeons, The Royal College of Surgeons of England, London,  
31  
32 UK.  
33

34 <sup>8</sup>Department of Surgery, University Hospitals Bristol NHS Foundation Trust, Bristol, UK.  
35  
36  
37

38  
39 Correspondence: B E Byrne

40  
41 Address: Centre for Surgical Research, Population Health Sciences, Bristol Medical School, University  
42  
43 of Bristol, Canynge Hall, 39 Whatley Road, Clifton, Bristol BS8 2PS, UK.  
44

45 Email: [benbyrne@doctors.org.uk](mailto:benbyrne@doctors.org.uk).

46  
47 Telephone: 0117 928 7279  
48  
49

50  
51 Word count: 3056  
52  
53  
54  
55  
56  
57  
58  
59  
60

**ABSTRACT**

Objectives: This study used national audit data to describe current management and outcomes of patients undergoing surgery for complications of peptic ulcer disease, including perforation and bleeding. It was also planned to explore factors associated with fatal outcome after surgery for perforated ulcers. These analyses were designed to provide a thorough understanding of current practice, and identify potentially modifiable factors associated with outcome as targets for future quality improvement.

Design: National cohort study using National Emergency Laparotomy Audit (NELA) data.

Setting: English and Welsh hospitals within the National Health Service.

Participants: Adult patients admitted as an emergency with perforated or bleeding peptic ulcer disease between December 2013 and November 2015.

Interventions: Laparotomy for bleeding or perforated peptic ulcer.

Primary and secondary outcome measures: The primary outcome was 60-day in-hospital mortality.

Secondary outcomes included length of postoperative stay, readmission and reoperation rate.

Results: 2444 and 382 procedures were performed for perforated and bleeding ulcers, respectively.

In-hospital 60-day mortality rates were 287/2444 (11.7%, 95% confidence intervals (CI) 10.5–13.1%)

for perforations, and 68/382 (17.8%, CI 14.1–22.0%) for bleeding. Median (interquartile range) 2-

year institutional volume was 12 (7-17) and 2 (1-3) for perforation and bleeding, respectively. Age,

American Society of Anesthesiology score and pre-operative systolic blood pressure were associated

1  
2  
3 with mortality, with no association with time from admission to operation, surgeon grade or  
4  
5 operative approach.  
6  
7

8  
9 Conclusions: Patients undergoing surgery for complicated PUD face a high 60-day mortality risk.

10 Exploratory analyses suggested fatal outcome was primarily associated with patient rather than  
11  
12 provider care factors. Therefore, it may be challenging to reduce mortality rates further. NELA data  
13  
14 provides important benchmarking for patient consent, and has highlighted low institutional volume  
15  
16 and high mortality rates after surgery for bleeding peptic ulcers as a target for future research and  
17  
18 improvement.  
19  
20  
21  
22  
23  
24  
25  
26  
27  
28  
29  
30  
31  
32  
33  
34  
35  
36  
37  
38  
39  
40  
41  
42  
43  
44  
45  
46  
47  
48  
49  
50  
51  
52  
53  
54  
55  
56  
57  
58  
59  
60

## ARTICLE SUMMARY

### Strengths and limitations of this study

- This multicentre study examined usual clinical practice across a large number of hospitals in the National Health Service in England and Wales, representing the largest study of complicated peptic ulcer disease yet reported in the United Kingdom.
- Structured data was collected prospectively, mitigating against bias associated with retrospective study design.
- However, case ascertainment within the entire National Emergency Laparotomy Audit patient cohort, the main dataset from which the current study data was extracted, was 83% and missing data may have introduced unknown biases into the study.

## INTRODUCTION

Surgical treatment of peptic ulcer disease (PUD) has changed markedly over recent years. Overall operative intervention has declined, with a substantial fall in elective procedures such as gastric resection, vagotomy and pyloroplasty[1–3]. However, there remains clinical need for surgical treatment for complications of PUD, with emergency procedures now representing the principal role for operative intervention in this condition[4]. Earlier studies and nationwide audits show postoperative mortality following emergency surgery for perforated or bleeding ulcers to range from 9.1% to 26.5% although data from contemporary UK practice is lacking[2,5–8].

The National Emergency Laparotomy Audit (NELA) is a mandatory audit that captures rich data about the care of patients undergoing a range of emergency bowel operations in England and Wales. NELA was established in 2012 and is run by the Royal College of Anaesthetists, in collaboration with the Clinical Effectiveness Unit at the Royal College of Surgeons of England. The audit aims to improve the quality of care for patients undergoing emergency laparotomy, by collecting information on patients, the processes of care they receive and their short-term outcomes. These data are fed back locally, as well as being analysed nationally, and compared against accepted audit standards. To date, there have been three audit reports, most recently documenting a 30-day post-operative mortality rate of 10.6% (95% confidence intervals (CI) 10.2% – 11.0%) and a median length of stay of 11 days across the range of patients and conditions included[9–11].

The present study aimed to use NELA data to identify patients undergoing surgery for perforated or bleeding PUD, to describe the latest management and short-term outcomes for these patients. The study also explored factors that may be associated with mortality after surgery for perforated PUD. A thorough appraisal of current practice is critical for benchmarking performance, and appropriately directing future research and quality improvement.

## METHODS

The NELA database contains information collected at the level of individual operations for patients, covering details of the admission, pre-operative management and risk-stratification, intra-operative details, post-operative risk and patient outcomes. From this database, patients aged 18 years or over undergoing 'Peptic ulcer – suture or repair of perforation' or 'Peptic ulcer – oversew of bleed' as their first, main surgical procedure after admission, between 1<sup>st</sup> December 2013 and 30<sup>th</sup> November 2015, were selected for inclusion. Re-operations and patients undergoing 'Gastric surgery – other', which is likely to have included formal surgical resection, were excluded. Data for the first and second years of the study were extracted on 1<sup>st</sup> February in 2015 and 2016, respectively. Data on age, sex, American Society of Anesthesiologists (ASA) score, pre-operative heart rate (HR), pre-operative systolic blood pressure (SBP), pre-operative predicted mortality (P-POSSUM)[12] and morbidity (POSSUM) were extracted[13]. NELA specifies recording of HR and SBP values closest to the time of booking the patient for theatre. Pre-operative care details, including the use of Computed Tomography (CT), time from admission to operation, time from admission to decision to operate, time from decision to operate to operation, and time from admission to antibiotics were also recorded. Information on the grade of most senior operating surgeon and surgical approach (open or minimal access), as well as intra-operative findings (extent and type of peritoneal contamination, see supplementary table 1), were examined, along with the immediate postoperative level of care (ward, level 2 or high dependency unit (HDU), and level 3 or intensive care unit (ICU)) and hospital procedure volume. The following outcomes were examined: total length of stay in an enhanced care setting (HDU or ITU); total postoperative length of stay; return to theatre; and in-hospital death within 60 days of the primary operative procedure.

### Statistical analysis



1  
2  
3 Patients were grouped according to presentation with perforation or bleeding secondary to PUD.  
4  
5 Continuous data were described using mean and standard deviation or median and interquartile  
6  
7 range if skewed, and category data were summarised as number and percentage. Length of stay was  
8  
9 summarised using survival methods with deaths prior to discharge treated as censored observations.  
10

11  
12  
13 For patients with perforated PUD, associations between patient, care and operative factors and  
14  
15 mortality were examined using multilevel logistic regression, with hospital fitted as random effect.  
16  
17 For this analysis alone, only patients undergoing surgery for perforation within 48 hours of  
18  
19 admission to hospital were included. This was designed to exclude patients who developed a  
20  
21 perforation during their admission, and patients undergoing surgery after an unsuccessful period of  
22  
23 non-operative management. Such patients may represent a different population with a different risk  
24  
25 profile. For example, severely comorbid patients with mild clinical signs may preferentially be  
26  
27 selected for initial non-operative management. The following variables were selected for exploration  
28  
29 by consensus within the working group before analysis: age; sex; ASA; HR; SBP; pre-operative CT;  
30  
31 time from admission to operation; grade of senior operating surgeon; operative approach;  
32  
33 peritoneal contamination type; peritoneal contamination extent; and post-operative care level.  
34  
35 Variables with many categories were grouped for analysis (see supplementary table 1). Fractional  
36  
37 polynomials were used to describe the relationship between continuous variables and mortality  
38  
39 (supplementary table 2). Data that was clearly incorrect was recoded as missing. The analysis was  
40  
41 restricted to cases with complete data for the variables of interest. All variables were included in the  
42  
43 model and not selected based on statistical significance. All analysis was conducted using Stata 14.0  
44  
45 (StataCorp, College Station, TX).  
46  
47  
48  
49  
50  
51  
52

### 53 **Ethics**

54  
55  
56  
57  
58  
59  
60

1  
2  
3 NELA has approval from the Health Research Authority's Confidentiality Advisory Group for 'Use of  
4 Patient Identifiable Information without Consent' (Section 251 of NHS Act 2006 and Health Service  
5 (Control of Patient Information) Regulations 2002). The present analysis was performed under  
6  
7 NELA's remit to understand and inform the delivery of care to patients undergoing emergency  
8  
9 laparotomy. The data extract included anonymised patient level data. Therefore, further approval by  
10  
11 a research ethics committee was not required. Participating Trusts follow local governance  
12  
13 arrangements for audit registration. Patient data are uploaded via an encrypted website to a secure  
14  
15 server. Access is carefully restricted and data used in accordance with the Caldicott principles[14].  
16  
17  
18  
19  
20

### 21 **Patient involvement**

22  
23  
24  
25  
26 Patients were not involved in any aspect of the design or conduct of this study.  
27  
28  
29  
30  
31  
32  
33  
34  
35  
36  
37  
38  
39  
40  
41  
42  
43  
44  
45  
46  
47  
48  
49  
50  
51  
52  
53  
54  
55  
56  
57  
58  
59  
60

## RESULTS

### Patient characteristics and hospital volume

During the study period, 43 321 emergency laparotomies were identified at 192 hospitals in England and Wales. Data on 2444 (5.5%) perforated peptic ulcers and 382 (0.9%) bleeding ulcers were retrieved from 186 (96.9%) contributing hospitals. Patient characteristics are shown in table 1. Over the two-year period, the median number of cases per hospital was 12 (IQR 7-17) and 2 (IQR 1-3) for perforated and bleeding ulcers, respectively.

Table 1. Pre-operative details of patients undergoing surgery for perforation or bleeding.

|                                |         | Perforation<br>n=2444 (%) |        | Bleed<br>n=382 (%) |        | All PUD<br>n=2826 (%) |        |
|--------------------------------|---------|---------------------------|--------|--------------------|--------|-----------------------|--------|
| Age (years)                    |         | 57.8                      | (19.4) | 65.0               | (16.3) | 58.8                  | (19.2) |
| Sex                            | Male    | 1450                      | (59.3) | 240                | (62.8) | 1690                  | (59.8) |
| ASA                            | 1       | 569                       | (23.3) | 30                 | (7.9)  | 599                   | (21.2) |
|                                | 2       | 738                       | (30.2) | 64                 | (16.8) | 802                   | (28.4) |
|                                | 3       | 611                       | (25.0) | 98                 | (25.7) | 709                   | (25.1) |
|                                | 4       | 461                       | (18.9) | 158                | (41.4) | 619                   | (21.9) |
|                                | 5       | 65                        | (2.7)  | 32                 | (8.4)  | 97                    | (3.4)  |
| Pre-op heart rate              | <80     | 449                       | (18.6) | 47                 | (12.5) | 496                   | (17.8) |
|                                | 80-99   | 928                       | (38.4) | 140                | (37.1) | 1068                  | (38.2) |
|                                | 100-119 | 704                       | (29.1) | 109                | (28.9) | 813                   | (29.1) |
|                                | 120-139 | 267                       | (11.0) | 65                 | (17.2) | 332                   | (11.9) |
| Pre-op systolic blood pressure | ≥140    | 69                        | (2.9)  | 16                 | (4.2)  | 85                    | (3.0)  |
|                                | <80     | 63                        | (2.6)  | 37                 | (11.6) | 100                   | (3.6)  |
|                                | 80-99   | 260                       | (10.8) | 96                 | (30.1) | 356                   | (12.8) |
|                                | 100-119 | 670                       | (27.8) | 118                | (37.0) | 788                   | (28.3) |
|                                | 120-139 | 831                       | (34.5) | 68                 | (21.3) | 899                   | (32.3) |
| Predicted mortality (P-POSSUM) | 140-159 | 429                       | (17.8) | 43                 | (11.4) | 472                   | (16.9) |
|                                | ≥160    | 157                       | (6.5)  | 15                 | (4.0)  | 172                   | (6.2)  |
|                                | <5%     | 935                       | (38.3) | 49                 | (12.8) | 984                   | (34.8) |
|                                | 5-9%    | 416                       | (17.0) | 37                 | (9.7)  | 453                   | (16.0) |
|                                | 10-24%  | 445                       | (18.2) | 74                 | (19.4) | 519                   | (18.4) |
| Predicted morbidity (POSSUM)   | 25-49%  | 292                       | (11.9) | 83                 | (21.7) | 375                   | (13.3) |
|                                | ≥50%    | 356                       | (14.6) | 139                | (36.4) | 495                   | (17.5) |
|                                | <25%    | 54                        | (2.2)  | 2                  | (0.5)  | 56                    | (2.0)  |
|                                | 25-49%  | 385                       | (15.8) | 16                 | (4.2)  | 401                   | (14.2) |
|                                | 50-74%  | 747                       | (30.6) | 53                 | (13.9) | 800                   | (28.3) |
|                                | ≥75%    | 1258                      | (51.5) | 311                | (81.4) | 1569                  | (55.5) |

Age provided as mean (standard deviation); PUD – peptic ulcer disease; ASA – American Society of Anesthesiology score; P-POSSUM – Portsmouth-POSSUM; POSSUM – Physiological and Operative Severity Score for the enUmeration of Mortality and morbidity.

## Pre-operative care

Pre-operative imaging differed according to diagnosis, with the majority (1792 / 2444, 73.3%) of patients undergoing treatment for perforated ulcers receiving a pre-operative CT scan (table 2), compared with 101 / 382 (26.4%) of patients with a bleeding ulcer.

Table 2. Details of pre-operative care of patients undergoing surgery for perforation or bleeding.

|                  |                                  | Perforation |            | Bleed |             | All PUD |            |
|------------------|----------------------------------|-------------|------------|-------|-------------|---------|------------|
|                  |                                  | n=2444      | (%)        | n=382 | (%)         | n=2826  | (%)        |
| Pre-operative CT | Yes                              | 1792        | (74.1)     | 101   | (26.8)      | 1893    | (67.7)     |
|                  | No                               | 626         | (25.9)     | 276   | (73.2)      | 902     | (32.3)     |
| Time (hours)     | Admission to operation           | 8.8         | (5.3-18.9) | 30.4  | (9.4-107.8) | 9.7     | (5.5-23.4) |
|                  | Admission to decision to operate | 6.0         | (3.1-14.6) | 29.3  | (7.5-119.3) | 6.5     | (3.3-19.4) |
|                  | Decision to operate to operation | 2.0         | (1.2-3.4)  | 1.1   | (0.5-2.1)   | 1.9     | (1.1-3.2)  |
|                  | Admission to first antibiotics   | 4.6         | (2.1-10.1) | 11.8  | (3.8-47.8)  | 5.0     | (2.3-11.9) |

Timing data provided as median (interquartile range); PUD – peptic ulcer disease; CT – computed tomography scan.

Median interval from admission to surgery was 8.8 hours (IQR 5.3 – 18.9) in patients with a perforated ulcer, and 30.4 hours (IQR 9.4 – 107.8) in those with a bleeding ulcer. Median interval from decision to operate to surgery was 2.0 (IQR 1.2 – 3.4) and 1.1 (IQR 0.5 – 2.1) hours in patients with perforations and bleeding ulcers, respectively. Patients admitted with a perforated ulcer received their first dose of antibiotics at a median of 4.6 (IQR 2.1 – 10.1; data recorded for 2085 / 2444 (85.3%) of patients) hours after admission, and those undergoing surgery for bleeding ulcers received antibiotics at a median of 11.8 hours (IQR 3.8 – 47.8; data for 273 / 382 (71.5%) of patients).

## Operative details and postoperative care level

Consultants were recorded as the senior surgeon in the majority of cases and most surgery was performed via the open approach (table 3). However, 489 / 2 444 (20.0%) patients underwent some form of laparoscopic surgery for their perforated ulcer, with 320 (13.1%) procedures completed laparoscopically. The nature and extent of peritoneal contamination differed according to the clinical problem. The majority of patients with perforated ulcers had significant contamination affecting multiple quadrants.

Table 3. Operative details and postoperative destination for patients undergoing surgery for perforation or bleeding.

|                          |                      |                                   | Perforation    |        | Bleed  |        | All PUD |        |        |
|--------------------------|----------------------|-----------------------------------|----------------|--------|--------|--------|---------|--------|--------|
|                          |                      |                                   | n=2444         | (%)    | n=382  | (%)    | n=2826  | (%)    |        |
| Operation                | Senior surgeon       | Consultant                        | 1763           | (72.1) | 347    | (90.1) | 2110    | (74.7) |        |
|                          |                      | Specialty trainee                 | 453            | (18.5) | 27     | (7.1)  | 480     | (17.0) |        |
| Other                    |                      | 228                               | (9.3)          | 8      | (2.1)  | 236    | (8.4)   |        |        |
| Approach                 | Approach             | Open                              | 1955           | (80.0) | 367    | (96.1) | 2322    | (82.2) |        |
|                          |                      | Laparoscopic (including assisted) | 320            | (13.1) | 10     | (2.6)  | 330     | (11.7) |        |
|                          |                      | Laparoscopic converted            | 169            | (6.9)  | 5      | (1.3)  | 174     | (6.2)  |        |
|                          |                      | Contamination type                | None / minimal | 425    | (17.4) | 250    | (65.4)  | 675    | (23.9) |
| Contamination extent     | Contamination type   | Significant                       | 2019           | (82.6) | 132    | (34.6) | 2151    | (76.1) |        |
|                          |                      | None / single quadrant            | 753            | (30.8) | 319    | (83.5) | 1072    | (37.9) |        |
| Postoperative care level | Contamination extent | Multiple quadrants                | 1691           | (69.2) | 63     | (16.5) | 1754    | (62.1) |        |
|                          |                      | Postoperative care level          | Ward (level 1) | 1015   | (41.5) | 68     | (17.8)  | 1083   | (38.4) |
|                          |                      | HDU (level 2)                     | 652            | (26.7) | 99     | (25.9) | 751     | (26.6) |        |
|                          |                      | ITU (level 3)                     | 774            | (31.7) | 212    | (55.5) | 986     | (35.0) |        |

PUD – peptic ulcer disease; HDU – high dependency unit; ITU – intensive therapy unit.

Most patients who underwent surgery to repair a perforated ulcer (1426 / 2444, 58.3%) were transferred to a HDU or ITU environment, with the remainder being transferred to a ward. A much higher proportion of patients operated on for bleeding went to HDU or ITU after surgery (311 / 382, 81.4%).

## Outcomes

Among patients transferred to HDU or ITU, the median postoperative stay in an enhanced care environment was 4 days for both groups (table 4). The median total postoperative stay was 8.4 days for patients treated for a perforated ulcer, compared with a longer median stay of 15.0 days for bleeding ulcers. The rate of return to theatre was lower among patients operated on for perforation (136 / 2 444, 5.6%) than after surgery for bleeding (36 / 382, 9.4%). In each group, three patients died in theatre. The overall, 60-day in-hospital mortality was 287 / 2 444 (11.7%, 95% CI 10.5% – 13.1%) after surgery for a perforated ulcer, and 68 / 382 (17.8%, 95% CI 14.1% – 22.0%) after oversew of a bleeding ulcer.

Table 4. Outcomes of patients undergoing surgery for perforation or bleeding.

|                                      |                   | Perforation<br>n=2 444 |            | Bleed<br>n=382 |            | All PUD<br>n=2826 |            |
|--------------------------------------|-------------------|------------------------|------------|----------------|------------|-------------------|------------|
|                                      |                   |                        | (%)        |                | (%)        |                   | (%)        |
| Length of stay (days)                | HDU / ITU         | 4.0                    | (2.0-7.0)  | 4.0            | (2.0-8.0)  | 4.0               | (2.0-7.0)  |
|                                      | Total             | 8.4                    | (5.2-18.4) | 15.0           | (7.5-29.0) | 9.2               | (5.4-20.0) |
| Return to theatre                    |                   | 136                    | (5.6)      | 36             | (9.4)      | 172               | (6.1)      |
| Mortality in-hospital within 60 days |                   | 287                    | (11.7)     | 68             | (17.8)     | 355               | (12.6)     |
|                                      | (Died in theatre) | 3                      | (0.1)      | 3              | (0.8)      | 6                 | (0.2)      |

Length of stay provided as median (interquartile range). PUD – peptic ulcer disease; HDU – high dependency unit; ITU – intensive therapy unit.

### Exploratory analysis

Of 2 327 patients where time from admission to operation was recorded, 2 231 (96.1%) underwent surgery for perforation in the first 48 hours after admission. Complete data for regression analysis were available for 2 162 (96.7%) of these patients. Variables identified as significantly associated with in-hospital 60-day mortality (after accounting for other variables) were age, ASA, pre-operative SBP and post-operative care level (table 5). For each increasing year of age, the risk of death rose by 5.0% (95% CI 3.5% – 6.5%), meaning that an increase of 10 years of age was associated with increased risk of death of 63.3% (95% CI 41.6% – 88.4%). An ASA score of 4 or 5 was associated with a markedly elevated risk of fatal outcome compared to an ASA of 1. There was also an increased risk

of death for patients going to HDU or ITU compared to those transferred directly to a ward. The association between pre-operative SBP and postoperative mortality was non-linear (illustrated in figure 1). Extremes of low or high SBP were associated with increased risk of death. There was no statistically significant association observed between patient sex, pre-operative HR, use of pre-operative CT, time from admission to operation, operating surgeon, operative approach, intra-operative contamination type or extent and subsequent in-hospital mortality.

Table 5. Multilevel logistic regression results, examining factors associated with 60-day in-hospital mortality after surgery for perforation; analysis restricted to patients undergoing surgery within 48 hours of admission.

|                                             |                              | Odds ratio | 95% confidence intervals |       | <i>p</i> -value |
|---------------------------------------------|------------------------------|------------|--------------------------|-------|-----------------|
|                                             |                              |            | Lower                    | Upper |                 |
| Age (per year)                              |                              | 1.05       | 1.04                     | 1.07  | <0.001          |
| Sex                                         | Male                         | 1.00       |                          |       |                 |
|                                             | Female                       | 1.00       | 0.70                     | 1.42  | 0.999           |
| ASA                                         | 1                            | 1.00       |                          |       | <0.001          |
|                                             | 2                            | 0.77       | 0.26                     | 2.26  |                 |
|                                             | 3                            | 2.10       | 0.77                     | 5.76  |                 |
|                                             | 4 & 5                        | 7.19       | 2.62                     | 19.73 |                 |
| Pre-op heart rate (per 10 bpm)              |                              | 1.03       | 0.95                     | 1.11  | 0.529           |
| Pre-op systolic blood pressure*             |                              |            |                          |       | <0.001          |
| Pre-op CT                                   | No                           | 1.00       |                          |       |                 |
|                                             | Yes                          | 1.41       | 0.90                     | 2.22  | 0.133           |
| Time from admission to operation (per hour) |                              | 1.01       | 0.99                     | 1.02  | 0.392           |
| Operating surgeon                           | Consultant                   | 1.00       |                          |       |                 |
|                                             | Non-consultant               | 0.90       | 0.57                     | 1.40  | 0.633           |
| Operative approach                          | Open                         | 1.00       |                          |       |                 |
|                                             | Laparoscopic (inc. assisted) | 0.78       | 0.40                     | 1.50  | 0.459           |
| Contamination type                          | None / minimal               | 1.00       |                          |       |                 |
|                                             | Significant                  | 0.88       | 0.49                     | 1.58  | 0.660           |
| Contamination extent                        | None / single quadrant       | 1.00       |                          |       |                 |
|                                             | Multiple quadrants           | 1.14       | 0.70                     | 1.84  | 0.605           |
| Postoperative destination                   | Ward                         | 1.00       |                          |       |                 |
|                                             | HDU or ITU                   | 2.22       | 1.20                     | 4.11  | 0.011           |

\* - non-linear relationship; ASA – American Society of Anesthesiology score; CT – computed

tomography scan; HDU – high dependency unit; ITU – intensive therapy unit.

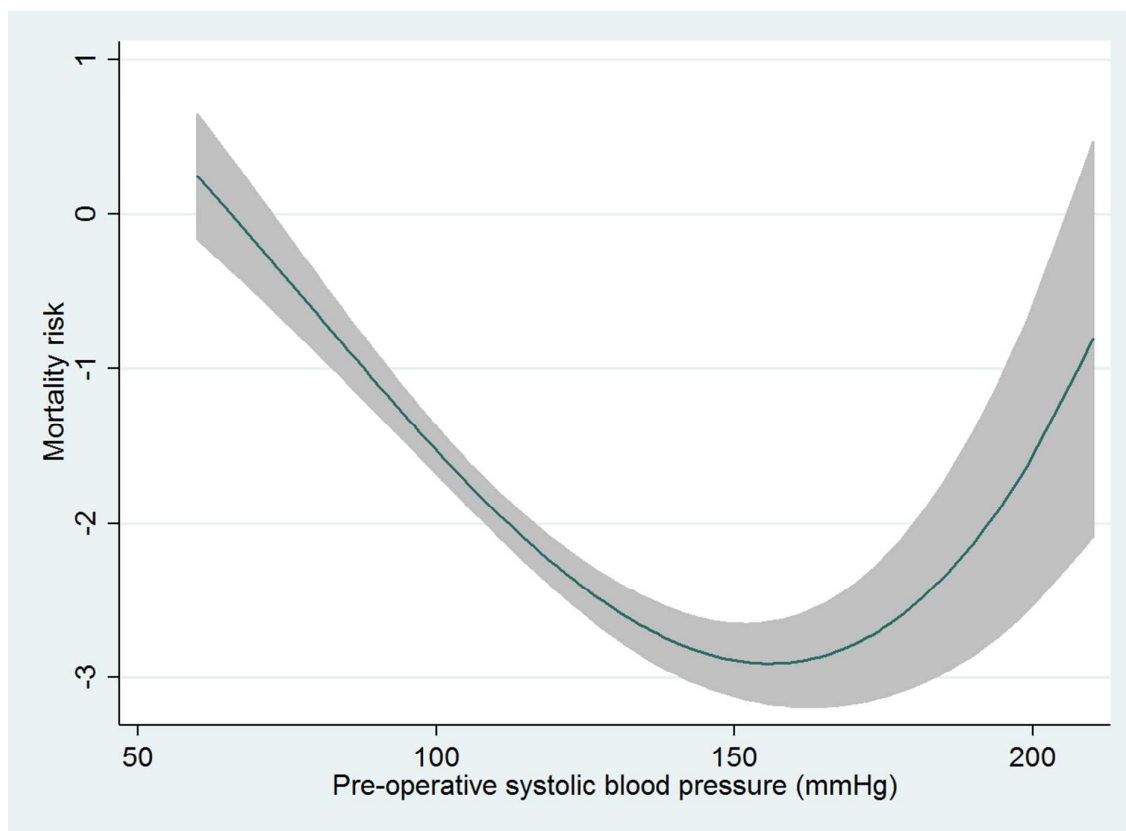

Fig 1. Illustration of non-linear relationship between pre-operative systolic blood pressure and 60-day in-hospital mortality.



## DISCUSSION

This is the first national study in the United Kingdom of complicated peptic ulcer disease requiring emergency surgery. Using two years of NELA data, we identified 2444 and 382 patients from 186 English and Welsh hospitals undergoing surgery for perforated or bleeding PUD. The post-operative in-hospital 60-day mortality rates were 11.7% and 17.8%, respectively. Mortality after repair of perforated ulcer was primarily associated with patient factors, rather than more easily modifiable aspects of the care provided. This may make it difficult to reduce mortality rates further. Average institutional surgical volume for bleeding ulcers was very low, and these patients had the highest mortality risk, highlighting the challenge and urgent need for further work to understand and improve outcomes in this group.

While mortality rates among the included patients were high, the reported results compare favourably with data from other research. Recent European studies have reported 90-day mortality rates from 19.2% - 29.8% after surgery for perforated PUD[5,15]. Among patients undergoing surgery for bleeding peptic ulcers, 30-day mortality rates were higher, ranging from 23.7% to 25.6%[7,16], with previous UK research revealing a 30% (CI 22% – 38%) post-operative mortality rate[17]. A recent large US study using American College of Surgeons National Surgical Quality Improvement Program data demonstrated similar rates to those observed in this study with 12.1% (CI 10.8% - 13.5%) and 18.6% (CI 15.9% - 21.5%) 30-day mortality after surgery for perforation and bleeding PUD respectively.

The exploratory analysis of factors associated with mortality after repair of perforation generated new, unexpected findings. The significant associations between age, ASA and preoperative SBP and post-operative mortality are unsurprising and agree with previous research[18]. However, the lack of association with time from admission to surgery disagrees with the published literature. For

1  
2  
3 example, Buck et al reported that after adjusting for prognostic variables, each hour of surgical delay  
4  
5 during the first 24 hours of admission was associated with a 2.4% (CI 1.1 – 3.7%) decrease in the  
6  
7 probability of survival[19]. However, that study used less nuanced modelling of continuous variables  
8  
9 such as age or shock, which were reduced to dichotomous variables. In addition, they did not  
10  
11 describe any exclusion criteria based on time from admission to surgery, raising the possibility that  
12  
13 their cohort included patients undergoing surgery after failed conservative management, and those  
14  
15 developing a perforation during their hospital admission. The present lack of association between  
16  
17 time from admission to operation has important clinical implications, especially when considered  
18  
19 alongside the significant association between pre-operative SBP and mortality. Together, these  
20  
21 findings may be interpreted to suggest that a short delay in transfer to the operating theatre for  
22  
23 appropriate investigations or fluid optimisation is unlikely to compromise survival outcomes. Indeed,  
24  
25 if it is possible to improve a patient's physiological condition and SBP, this has potential to reduce  
26  
27 mortality rates. However, caution must be exercised in this interpretation, and future research  
28  
29 should explore this finding in more detail.  
30  
31

32  
33  
34 This study found that 13.1% of patients underwent surgical repair of their perforated ulcer via a  
35  
36 laparoscopic approach. A further 6.9% were converted from laparoscopic to open. Although the  
37  
38 reasons for conversion were not recorded, it is possible that some patients underwent an initial  
39  
40 diagnostic laparoscopy before proceeding directly to open repair once the a diagnosis was made. A  
41  
42 smaller Danish study of 726 patients undergoing surgery for perforated PUD reported a laparoscopy  
43  
44 rate of 32.8%, with 24.5% converted from laparoscopic to open[20]. The lower rate in the present  
45  
46 study may represent under-reporting, as, anecdotally, some clinicians may not have considered a  
47  
48 laparoscopic suture repair eligible for a laparotomy audit. Future comparison with Hospital Episode  
49  
50 Statistics administrative data, available for all NHS activity, could test this hypothesis. Alternatively,  
51  
52 the lower rate may be a true reflection of practice, and lack of skills or confidence in performing  
53  
54 laparoscopic repair. The lack of association between operative approach and outcome may suggest  
55  
56  
57  
58  
59

1  
2  
3 that patients are being treated laparoscopically on the availability of appropriately skilled surgeons,  
4 rather than through careful case selection or 'picking winners'. Further and more detailed analysis is  
5 warranted.  
6  
7  
8  
9

10  
11 This study has not defined clear ways to improve the survival of the patients included. It has,  
12 however, identified aspects of the care provided that were not associated with mortality, suggesting  
13 that these should not be the primary focus for immediate quality improvement. The results provide  
14 no evidence that more rapid transfer to the operating theatre, greater consultant presence or  
15 adoption of minimal access techniques would improve survival rates. Preoperative SBP is potentially  
16 modifiable and may be an appropriate target for future research and quality improvement. Selection  
17 of patients for postoperative care in the HDU or ITU environment, and other variables not analysed  
18 due to missing data, such as time from admission to antibiotics, should also be investigated further.  
19  
20  
21  
22  
23  
24  
25  
26  
27  
28  
29

30 The results highlight the low institutional volume for the included procedures, particularly for  
31 bleeding PUD requiring surgery. Endoscopy is the first line investigation and treatment for upper  
32 gastrointestinal bleeding, and previous large studies have demonstrated the high success rates of  
33 endoscopic therapy for bleeding ulcers, with surgery required in 1.9-5.4% of cases[5,16,17]. National  
34 guidance in the UK suggests interventional radiology and embolisation should be offered as second-  
35 line treatment[21], but few hospitals have 24/7 access to this service. When requiring surgery, these  
36 patients are high risk, as reflected in their ASA scores, with associated high levels of senior  
37 involvement in theatre. Low procedure volumes make it difficult to develop expertise managing  
38 these patients, which in turn may make it difficult to improve outcomes. In several surgical  
39 specialties, higher procedure volume has been associated with improved outcomes[22-24].  
40  
41 However, it is not clear whether such a volume-outcome relationship exists for emergency surgery  
42 for bleeding peptic ulcers. It would likely be difficult to centralise secondary treatment required for  
43  
44  
45  
46  
47  
48  
49  
50  
51  
52  
53  
54  
55  
56  
57  
58  
59  
60

1  
2  
3 an unstable patient. Further research, using quantitative databases and case-studies in different  
4  
5 centres, may determine future strategies to improve care for these patients.  
6  
7

8  
9 This study has several strengths, as a nationwide prospective audit. However, there are limitations.  
10  
11 Whilst participation is mandatory, case ascertainment was estimated at 83% in the first two years of  
12  
13 the audit[9,10]. No eligible procedures were identified in 6 (3.1%) of hospitals participating in NELA.  
14  
15 Research in other areas has found that voluntary clinical databases typically demonstrate a lower  
16  
17 mortality rate than population-based administrative data[25,26]. Therefore, it is possible that  
18  
19 mortality rates across the country are higher than observed, further highlighting the need for more  
20  
21 work in this area. In addition, deaths after discharge, or during the index admission but more than  
22  
23 60 days after the operative procedure, were not included. Another limitation is possible variation in  
24  
25 coding of information, which depends upon how different observers interpret the terms. For  
26  
27 example, coding of contamination in bleeding ulcers may have reflected existing contamination, or it  
28  
29 may have reflected contamination due to the enterotomy required to visualise and treat the  
30  
31 bleeding ulcer. It is not possible to retrospectively check the accuracy of such data, which must be  
32  
33 taken at face value. While data completeness was satisfactory for the analysis presented, it is not  
34  
35 possible to determine whether missing data introduced systematic bias. The extent of missing data  
36  
37 precluded exploratory analysis of further variables of interest, such as time from admission to  
38  
39 antibiotics, and time from admission to decision to operate. While the results may be cautiously  
40  
41 generalised to similar populations and healthcare systems, differences in care organisation may limit  
42  
43 broad applicability.  
44  
45  
46  
47  
48

49 In summary, this national study has demonstrated mortality rates within the NHS in England and  
50  
51 Wales that compare favourably with previously published international results. The overall rate of  
52  
53 mortality, however, remains high. Exploratory analysis suggested fatal outcome after surgery for  
54  
55 perforation was primarily associated with patient factors rather than the care provided, and this may  
56  
57  
58

1  
2  
3 make further improvement difficult. As NELA accrues more data over the remaining years of the  
4  
5 project, it may be feasible to explore the association between other, modifiable care factors, such as  
6  
7 time to antibiotics, and clinical outcomes and this could aid further research. Surgical management  
8  
9 of bleeding PUD represents an area of practice with very low volume and high postoperative  
10  
11 mortality that mandates further investigation. Centralisation may be considered, though this could  
12  
13 be difficult due to the acuity of patients requiring surgery in this setting. Research using future audit  
14  
15 data may guide quality improvement efforts, to benefit patients requiring surgery for complications  
16  
17 of PUD.  
18  
19  
20  
21  
22  
23  
24  
25  
26  
27  
28  
29  
30  
31  
32  
33  
34  
35  
36  
37  
38  
39  
40  
41  
42  
43  
44  
45  
46  
47  
48  
49  
50  
51  
52  
53  
54  
55  
56  
57  
58  
59  
60

## Acknowledgements

The authors would like to thank the members of the NELA Project Team during the data collection period of this study: Mr Martin Cripps, Professor David Cromwell, Dr Emma Davies, Ms Sharon Drake, Dr Mike Galsworthy, Professor Mike Grocott, Dr Angela Kuryba, Mr Jose Lourtie, Dr Ramani Moonesinghe, Dr Dave Murray, Dr Matt Oliver, Mr Dimitri Papadimitriou, Dr Carol Peden, Dr Kate Walker.

## Funding

B E Byrne is an academic clinical fellow in surgery supported by the National Institute for Health Research (NIHR). J M Blazeby is a NIHR Senior Investigator. This work was undertaken with the support of the MRC ConDuCT-II (Collaboration and innovation for Difficult and Complex randomised controlled Trials In Invasive procedures) Hub for Trials Methodology Research (MR/K025643/1). The study was also supported by the NIHR Biomedical Research Centre at the University Hospitals Bristol NHS Foundation Trust and the University of Bristol. The views expressed are those of the authors and not necessarily those of the UK National Health Service, National Institute for Health Research, or the Department of Health. The National Emergency Laparotomy Audit is commissioned by the Healthcare Quality Improvement Partnership as part of the National Clinical Audit Programme on behalf of NHS England and the Welsh Government. The funders had no role in study design, data collection and analysis, decision to publish, or preparation of the manuscript.

## Competing interests

The authors have declared that no competing interests exist.

**Contributions**

IDA, IB and JMB conceived the study. MB and IDA acquired the data. BEB, MB and CAR analysed the data. All authors interpreted the data. BEB drafted the manuscript. MB, CAR, IDA, IB and JMB critically revised the manuscript for important intellectual content. All authors approved the final version for publication.

**Data sharing**

No additional data available.

**Previous presentation**

Parts of this work have been presented at the Association of Surgeons of Great Britain and Ireland International Surgical Congress, Glasgow, May 2017, and at the Association of Upper Gastro-Intestinal Surgeons 20<sup>th</sup> Annual Scientific Meeting, Cork, September 2017.

## REFERENCES

- 1 Bashinskaya B, Nahed B V, Redjal N, *et al*. Trends in peptic ulcer disease and the identification  
2 of *Helicobacter Pylori* as a causative organism: population-based estimates from the US  
3 Nationwide Inpatient Sample. *J Glob Infect Dis* 2011;**3**:366–70.
- 4  
5  
6  
7  
8  
9  
10  
11  
12  
13  
14  
15  
16  
17  
18  
19  
20  
21  
22  
23  
24  
25  
26  
27  
28  
29  
30  
31  
32  
33  
34  
35  
36  
37  
38  
39  
40  
41  
42  
43  
44  
45  
46  
47  
48  
49  
50  
51  
52  
53  
54  
55  
56  
57  
58  
59  
60
- 1 Wang YR, Richter JE, Dempsey DT. Trends and outcomes of hospitalizations for peptic ulcer  
2 disease in the United States, 1993 to 2006. *Ann Surg* 2010;**251**:51–8.  
3 doi:10.1097/SLA.0b013e3181b975b8
- 4 Bardhan KD, Williamson M, Royston C, *et al*. Admission rates for peptic ulcer in the Trent  
5 Region, UK, 1972-2000. Changing pattern, a changing disease? *Dig Liver Dis* 2004;**36**:577–88.  
6 doi:10.1016/j.dld.2004.04.007
- 7 Paimela H, Oksala NKJ, Kivilaakso E. Surgery for peptic ulcer today: a study on the incidence,  
8 methods and mortality in surgery for peptic ulcer in Finland between 1987 and 1999. *Dig  
9 Surg* 2004;**21**:185–91. doi:10.1159/000079654
- 10 Lolle I, Møller MH, Rosenstock SJ. Association between ulcer site and outcome in complicated  
11 peptic ulcer disease: a Danish nationwide cohort study. *Scand J Gastroenterol* 2016;**51**:1165–  
12 71. doi:10.1080/00365521.2016.1190398
- 13 Lau JY, Sung J, Hill C, *et al*. Systematic review of the epidemiology of complicated peptic ulcer  
14 disease: incidence, recurrence, risk factors and mortality. *Digestion* 2011;**84**:102–13.  
15 doi:10.1159/000323958
- 16 Kyaw M, Tse Y, Ang D, *et al*. Embolization versus surgery for peptic ulcer bleeding after failed  
17 endoscopic hemostasis: a meta-analysis. *Endosc Int Open* 2014;**2**:E6–14. doi:10.1055/s-0034-  
18 1365235
- 19 Schroder VT, Pappas TN, Vaslef SN, *et al*. Vagotomy/Drainage is superior to local oversew in  
20 patients who require emergency surgery for bleeding peptic ulcers. *Ann Surg* 2014;**259**:1111–  
21 8. doi:10.1097/SLA.0000000000000386



- 1  
2  
3 9 NELA Project Team. The first patient report of the national emergency laparotomy audit.  
4  
5 2015.  
6  
7 10 NELA Project Team. The second patient report of the National Emergency Laparotomy Audit.  
8  
9 2016. <http://www.nela.org.uk/reports> (accessed 18 May 2017).  
10  
11 11 NELA Project Team. Third patient report of the National Emergency Laparotomy Audit. 2017.  
12  
13 12 Prytherch DR, Whiteley MS, Higgins B, *et al.* POSSUM and Portsmouth POSSUM for predicting  
14  
15 mortality. *Br J Surg* 1998;**85**:1217–20. doi:10.1046/j.1365-2168.1998.00840.x  
16  
17 13 Copeland GP, Jones D, Walters M. POSSUM: a scoring system for surgical audit. *Br J Surg*  
18  
19 1991;**78**:355–60. doi:10.1002/bjs.1800780327  
20  
21 14 NELA Project Team. Information governance procedures for NELA.  
22  
23 [http://nela.org.uk/download.php?fn=Information Governance Procedures for](http://nela.org.uk/download.php?fn=Information+Governance+Procedures+for+NELA.pdf&mime=application/pdf&pureFn=Information+Governance+Procedures+for+NELA.pdf)  
24  
25 NELA.pdf&mime=application/pdf&pureFn=Information Governance Procedures for NELA.pdf  
26  
27 (accessed 18 May 2017).  
28  
29  
30 15 Thorsen K, Søreide JA, Søreide K. Long-term mortality in patients operated for perforated  
31  
32 peptic ulcer: factors limiting longevity are dominated by older age, comorbidity burden and  
33  
34 severe postoperative complications. *World J Surg* 2017;**41**:410–8. doi:10.1007/s00268-016-  
35  
36 3747-z  
37  
38 16 Nykänen T, Peltola E, Kylänpää L, *et al.* Bleeding gastric and duodenal ulcers: case-control  
39  
40 study comparing angioembolization and surgery. *Scand J Gastroenterol* 2017;**52**:523–30.  
41  
42 doi:10.1080/00365521.2017.1288756  
43  
44  
45 17 Hearnshaw SA, Logan RFA, Lowe D, *et al.* Acute upper gastrointestinal bleeding in the UK:  
46  
47 patient characteristics, diagnoses and outcomes in the 2007 UK audit. *Gut* 2011;**60**:1327–35.  
48  
49 doi:10.1136/gut.2010.228437  
50  
51 18 Møller MH, Adamsen S, Thomsen RW, *et al.* Preoperative prognostic factors for mortality in  
52  
53 peptic ulcer perforation: A systematic review. *Scand J Gastroenterol* 2010;**45**:785–805.  
54  
55 doi:10.3109/00365521003783320  
56  
57  
58  
59  
60

- 1  
2  
3 19 Buck DL, Vester-Andersen M, Møller MH. Surgical delay is a critical determinant of survival in  
4 perforated peptic ulcer. *Br J Surg* 2013;**100**:1045–9. doi:10.1002/bjs.9175  
5  
6  
7 20 Wilhelmsen M, Møller MH, Rosenstock S. Surgical complications after open and laparoscopic  
8 surgery for perforated peptic ulcer in a nationwide cohort. *Br J Surg* 2015;**102**:382–7.  
9  
10  
11 doi:10.1002/bjs.9753  
12  
13 21 National Institute For Health and Care Excellence. Acute upper gastrointestinal bleeding in  
14 over 16s: management. 2012. [https://www.nice.org.uk/guidance/cg141/resources/acute-](https://www.nice.org.uk/guidance/cg141/resources/acute-upper-gastrointestinal-bleeding-in-over-16s-management-pdf-35109565796293)  
15  
16  
17  
18  
19  
20 22 Birkmeyer JD, Stukel T a, Siewers AE, *et al.* Surgeon volume and operative mortality in the  
21 United States. *N Engl J Med* 2003;**349**:2117–27. doi:10.1056/NEJMsa035205  
22  
23  
24 23 Markar SR, Karthikesalingam A, Thrumurthy S, *et al.* Volume-outcome relationship in surgery  
25 for esophageal malignancy: systematic review and meta-analysis 2000-2011. *J Gastrointest*  
26  
27  
28  
29  
30 24 Pieper D, Mathes T, Neugebauer E, *et al.* State of evidence on the relationship between high-  
31  
32  
33  
34  
35  
36  
37 25 Almoudaris AM, Burns EM, Bottle A, *et al.* A colorectal perspective on voluntary submission  
38 of outcome data to clinical registries. *Br J Surg* 2011;**98**:132–9. doi:10.1002/bjs.7301  
39  
40  
41 26 Aylin P, Lees T, Baker S, *et al.* Descriptive study comparing routine hospital administrative  
42 data with the Vascular Society of Great Britain and Ireland’s National Vascular Database. *Eur J*  
43  
44  
45  
46  
47  
48  
49  
50  
51  
52  
53  
54  
55  
56  
57  
58  
59  
60

1  
2  
3 **SUPPLEMENTARY MATERIAL**  
4  
5  
6  
7

8 Supplementary table 1. Grouping of categorical variables for analysis.  
9

| Variable                        | Group                  | Original values          |
|---------------------------------|------------------------|--------------------------|
| ASA                             | 1                      | 1                        |
|                                 | 2                      | 2                        |
|                                 | 3                      | 3                        |
|                                 | 4 & 5                  | 4                        |
|                                 |                        | 5                        |
| Peritoneal contamination type   | None / minimal         | None / serous            |
|                                 |                        | Gas / minimal            |
|                                 | Significant            | Pus                      |
|                                 |                        | Bile                     |
|                                 |                        | Gastro-duodenal contents |
|                                 |                        | Small bowel contents     |
|                                 |                        | Faeculent fluid          |
|                                 |                        | Faeces                   |
|                                 |                        | Blood                    |
|                                 |                        | None                     |
| Peritoneal contamination extent | None / single quadrant | Single quadrant          |
|                                 | Multiple quadrants     | Multiple quadrants       |
| Preoperative CT                 | No / missing           | No                       |
|                                 |                        | Missing                  |
| Senior operating surgeon grade  | Yes                    | Yes                      |
|                                 | Consultant             | Consultant               |
|                                 |                        | Post CCT fellow          |
|                                 |                        | Specialty trainee        |
|                                 |                        | SAS doctor               |
|                                 |                        | Research/clinical fellow |
|                                 |                        | Core trainee             |
| Operative approach              | Open                   | Open                     |
|                                 |                        | Laparoscopic converted   |
|                                 | Minimal access         | Laparoscopic             |
|                                 |                        | Laparoscopic assisted    |
| Postoperative care level        | Ward                   | Ward                     |
|                                 | HDU or ITU             | Level 2                  |
|                                 |                        | Level 3                  |

49 ASA – American Society of Anesthesiology score; CT – computed tomography scan; CCT – certificate

50 of completion of training; SAS – specialty and associate specialist doctors.  
51  
52  
53  
54  
55  
56  
57  
58  
59  
60

Supplementary table 2. Relationships between independent variables and mortality.

| Variable                              | Modelling function                |
|---------------------------------------|-----------------------------------|
| Age                                   | Linear                            |
| Preoperative HR                       | Linear                            |
| Preoperative SBP                      | 2-term square and cube polynomial |
| Time admission to decision to operate | Linear                            |

HR – heart rate; SBP – systolic blood pressure.

For peer review only

**STROBE 2007 (v4) Statement—Checklist of items that should be included in reports of cohort studies**

| Section/Topic             | Item # | Recommendation                                                                                                                                                                       | Reported on page # |
|---------------------------|--------|--------------------------------------------------------------------------------------------------------------------------------------------------------------------------------------|--------------------|
| Title and abstract        | 1      | (a) Indicate the study’s design with a commonly used term in the title or the abstract                                                                                               | 1                  |
|                           |        | (b) Provide in the abstract an informative and balanced summary of what was done and what was found                                                                                  | 2-3                |
| <b>Introduction</b>       |        |                                                                                                                                                                                      |                    |
| Background/rationale      | 2      | Explain the scientific background and rationale for the investigation being reported                                                                                                 | 5                  |
| Objectives                | 3      | State specific objectives, including any prespecified hypotheses                                                                                                                     | 5                  |
| <b>Methods</b>            |        |                                                                                                                                                                                      |                    |
| Study design              | 4      | Present key elements of study design early in the paper                                                                                                                              | 6                  |
| Setting                   | 5      | Describe the setting, locations, and relevant dates, including periods of recruitment, exposure, follow-up, and data collection                                                      | 6                  |
| Participants              | 6      | (a) Give the eligibility criteria, and the sources and methods of selection of participants. Describe methods of follow-up                                                           | 6                  |
|                           |        | (b) For matched studies, give matching criteria and number of exposed and unexposed                                                                                                  | NA                 |
| Variables                 | 7      | Clearly define all outcomes, exposures, predictors, potential confounders, and effect modifiers. Give diagnostic criteria, if applicable                                             | 6                  |
| Data sources/ measurement | 8*     | For each variable of interest, give sources of data and details of methods of assessment (measurement). Describe comparability of assessment methods if there is more than one group | 6                  |
| Bias                      | 9      | Describe any efforts to address potential sources of bias                                                                                                                            | NA                 |
| Study size                | 10     | Explain how the study size was arrived at                                                                                                                                            | NA                 |
| Quantitative variables    | 11     | Explain how quantitative variables were handled in the analyses. If applicable, describe which groupings were chosen and why                                                         | 7                  |
| Statistical methods       | 12     | (a) Describe all statistical methods, including those used to control for confounding                                                                                                | 7                  |
|                           |        | (b) Describe any methods used to examine subgroups and interactions                                                                                                                  | 7                  |
|                           |        | (c) Explain how missing data were addressed                                                                                                                                          | 7                  |
|                           |        | (d) If applicable, explain how loss to follow-up was addressed                                                                                                                       | NA                 |
|                           |        | (e) Describe any sensitivity analyses                                                                                                                                                | NA                 |
| <b>Results</b>            |        |                                                                                                                                                                                      |                    |

|                          |     |                                                                                                                                                                                                              |       |
|--------------------------|-----|--------------------------------------------------------------------------------------------------------------------------------------------------------------------------------------------------------------|-------|
| Participants             | 13* | (a) Report numbers of individuals at each stage of study—eg numbers potentially eligible, examined for eligibility, confirmed eligible, included in the study, completing follow-up, and analysed            | 9     |
|                          |     | (b) Give reasons for non-participation at each stage                                                                                                                                                         | NA    |
|                          |     | (c) Consider use of a flow diagram                                                                                                                                                                           | NA    |
| Descriptive data         | 14* | (a) Give characteristics of study participants (eg demographic, clinical, social) and information on exposures and potential confounders                                                                     | 9     |
|                          |     | (b) Indicate number of participants with missing data for each variable of interest                                                                                                                          | 10-11 |
|                          |     | (c) Summarise follow-up time (eg, average and total amount)                                                                                                                                                  | 12    |
| Outcome data             | 15* | Report numbers of outcome events or summary measures over time                                                                                                                                               | 12    |
| Main results             | 16  | (a) Give unadjusted estimates and, if applicable, confounder-adjusted estimates and their precision (eg, 95% confidence interval). Make clear which confounders were adjusted for and why they were included | 12    |
|                          |     | (b) Report category boundaries when continuous variables were categorized                                                                                                                                    | NA    |
|                          |     | (c) If relevant, consider translating estimates of relative risk into absolute risk for a meaningful time period                                                                                             | NA    |
| Other analyses           | 17  | Report other analyses done—eg analyses of subgroups and interactions, and sensitivity analyses                                                                                                               | 12-14 |
| <b>Discussion</b>        |     |                                                                                                                                                                                                              |       |
| Key results              | 18  | Summarise key results with reference to study objectives                                                                                                                                                     | 15    |
| <b>Limitations</b>       |     |                                                                                                                                                                                                              |       |
| Interpretation           | 20  | Give a cautious overall interpretation of results considering objectives, limitations, multiplicity of analyses, results from similar studies, and other relevant evidence                                   | 15-18 |
| Generalisability         | 21  | Discuss the generalisability (external validity) of the study results                                                                                                                                        | 18    |
| <b>Other information</b> |     |                                                                                                                                                                                                              |       |
| Funding                  | 22  | Give the source of funding and the role of the funders for the present study and, if applicable, for the original study on which the present article is based                                                | 20    |

\*Give information separately for cases and controls in case-control studies and, if applicable, for exposed and unexposed groups in cohort and cross-sectional studies.

**Note:** An Explanation and Elaboration article discusses each checklist item and gives methodological background and published examples of transparent reporting. The STROBE checklist is best used in conjunction with this article (freely available on the Web sites of PLoS Medicine at <http://www.plosmedicine.org/>, Annals of Internal Medicine at <http://www.annals.org/>, and Epidemiology at <http://www.epidem.com/>). Information on the STROBE Initiative is available at [www.strobe-statement.org](http://www.strobe-statement.org).

# BMJ Open

## Short-term outcomes after emergency surgery for complicated peptic ulcer disease from the UK National Emergency Laparotomy Audit: a cohort study.

|                                 |                                                                                                                                                                                                                                                                                                                                                                                                                                                                                                                                                                                                                                                                                                                                                                                                                                                                                                                                  |
|---------------------------------|----------------------------------------------------------------------------------------------------------------------------------------------------------------------------------------------------------------------------------------------------------------------------------------------------------------------------------------------------------------------------------------------------------------------------------------------------------------------------------------------------------------------------------------------------------------------------------------------------------------------------------------------------------------------------------------------------------------------------------------------------------------------------------------------------------------------------------------------------------------------------------------------------------------------------------|
| Journal:                        | <i>BMJ Open</i>                                                                                                                                                                                                                                                                                                                                                                                                                                                                                                                                                                                                                                                                                                                                                                                                                                                                                                                  |
| Manuscript ID                   | bmjopen-2018-023721.R1                                                                                                                                                                                                                                                                                                                                                                                                                                                                                                                                                                                                                                                                                                                                                                                                                                                                                                           |
| Article Type:                   | Research                                                                                                                                                                                                                                                                                                                                                                                                                                                                                                                                                                                                                                                                                                                                                                                                                                                                                                                         |
| Date Submitted by the Author:   | 02-Jul-2018                                                                                                                                                                                                                                                                                                                                                                                                                                                                                                                                                                                                                                                                                                                                                                                                                                                                                                                      |
| Complete List of Authors:       | Byrne, Benjamin; University of Bristol, Centre for Surgical Research, Population Health Sciences; University Hospitals Bristol NHS Foundation Trust, Department of Surgery<br>Bassett, Michael; Royal College of Anaesthetists, National Emergency Laparotomy Audit; Manchester University NHS Foundation Trust, Department of Anaesthesia<br>rogers, chris; University of Bristol, Clinical Trials and Evaluation Unit<br>Anderson, Iain; Royal College of Anaesthetists, National Emergency Laparotomy Audit; Salford Royal NHS Foundation Trust, Department of Surgery<br>Beckingham, Ian; Nottingham University Hospitals NHS Trust, Department of Surgery; Royal College of Surgeons of England, Association of Upper Gastrointestinal Surgeons<br>Blazeby, Jane; University of Bristol, Centre for Surgical Research, Population Health Sciences; University Hospitals Bristol NHS Foundation Trust, Department of Surgery |
| <b>Primary Subject Heading</b>: | Surgery                                                                                                                                                                                                                                                                                                                                                                                                                                                                                                                                                                                                                                                                                                                                                                                                                                                                                                                          |
| Secondary Subject Heading:      | Epidemiology, Gastroenterology and hepatology, Health services research                                                                                                                                                                                                                                                                                                                                                                                                                                                                                                                                                                                                                                                                                                                                                                                                                                                          |
| Keywords:                       | EPIDEMIOLOGY, Gastroduodenal disease < GASTROENTEROLOGY, Clinical audit < HEALTH SERVICES ADMINISTRATION & MANAGEMENT, Quality in health care < HEALTH SERVICES ADMINISTRATION & MANAGEMENT, SURGERY                                                                                                                                                                                                                                                                                                                                                                                                                                                                                                                                                                                                                                                                                                                             |
|                                 |                                                                                                                                                                                                                                                                                                                                                                                                                                                                                                                                                                                                                                                                                                                                                                                                                                                                                                                                  |

SCHOLARONE™  
Manuscripts

1  
2  
3 **Short-term outcomes after emergency surgery for complicated peptic ulcer disease from the UK**  
4  
5 **National Emergency Laparotomy Audit: a cohort study.**  
6  
7

8  
9 B E Byrne<sup>1</sup>, M Bassett<sup>2,3</sup>, C A Rogers<sup>4</sup>, I D Anderson<sup>2,5</sup>, I Beckingham<sup>6,7</sup>, J M Blazeby<sup>1,8</sup> for the National  
10  
11 Emergency Laparotomy Project Team and on behalf of the Association of Upper Gastrointestinal  
12  
13 Surgeons  
14

15 <sup>1</sup>Centre for Surgical Research, Population Health Sciences, Bristol Medical School, University of  
16  
17 Bristol, Bristol, UK.  
18

19 <sup>2</sup>National Emergency Laparotomy Audit, The Royal College of Anaesthetists, London, UK.  
20

21 <sup>3</sup>Department of Anaesthesia, Manchester University NHS Foundation Trust, Manchester, UK.  
22

23 <sup>4</sup>Clinical Trials and Evaluation Unit, Bristol Medical School, University of Bristol, Bristol, UK.  
24

25 <sup>5</sup>Department of Surgery, Salford Royal NHS Foundation Trust, Salford, UK.  
26  
27

28 <sup>6</sup>Department of Surgery, Nottingham University Hospitals NHS Trust, Nottingham, UK.  
29

30 <sup>7</sup>Association of Upper Gastrointestinal Surgeons, The Royal College of Surgeons of England, London,  
31  
32 UK.  
33

34 <sup>8</sup>Department of Surgery, University Hospitals Bristol NHS Foundation Trust, Bristol, UK.  
35  
36  
37

38  
39 Correspondence: B E Byrne

40  
41 Address: Centre for Surgical Research, Population Health Sciences, Bristol Medical School, University  
42  
43 of Bristol, Canynge Hall, 39 Whatley Road, Clifton, Bristol BS8 2PS, UK.  
44

45 Email: [benbyrne@doctors.org.uk](mailto:benbyrne@doctors.org.uk).

46  
47 Telephone: 0117 928 7279  
48  
49

50  
51 Word count: 3243  
52  
53  
54  
55  
56  
57  
58  
59



**ABSTRACT**

Objectives: This study used national audit data to describe current management and outcomes of patients undergoing surgery for complications of peptic ulcer disease, including perforation and bleeding. It was also planned to explore factors associated with fatal outcome after surgery for perforated ulcers. These analyses were designed to provide a thorough understanding of current practice and identify potentially modifiable factors associated with outcome as targets for future quality improvement.

Design: National cohort study using National Emergency Laparotomy Audit (NELA) data.

Setting: English and Welsh hospitals within the National Health Service.

Participants: Adult patients admitted as an emergency with perforated or bleeding peptic ulcer disease between December 2013 and November 2015.

Interventions: Laparotomy for bleeding or perforated peptic ulcer.

Primary and secondary outcome measures: The primary outcome was 60-day in-hospital mortality.

Secondary outcomes included length of postoperative stay, readmission and reoperation rate.

Results: 2444 and 382 procedures were performed for perforated and bleeding ulcers, respectively.

In-hospital 60-day mortality rates were 287/2444 (11.7%, 95% confidence intervals (CI) 10.5–13.1%) for perforations, and 68/382 (17.8%, CI 14.1–22.0%) for bleeding. Median (interquartile range) 2-year institutional volume was 12 (7-17) and 2 (1-3) for perforation and bleeding, respectively. In the exploratory analysis, age, American Society of Anesthesiology score and pre-operative systolic blood

1  
2  
3 pressure were associated with mortality, with no association with time from admission to operation,  
4  
5 surgeon grade or operative approach.  
6  
7  
8

9 Conclusions: Patients undergoing surgery for complicated PUD face a high 60-day mortality risk.

10 Exploratory analyses suggested fatal outcome was primarily associated with patient rather than  
11  
12 provider care factors. Therefore, it may be challenging to reduce mortality rates further. NELA data  
13  
14 provides important benchmarking for patient consent and has highlighted low institutional volume  
15  
16 and high mortality rates after surgery for bleeding peptic ulcers as a target for future research and  
17  
18 improvement.  
19  
20  
21  
22  
23  
24  
25  
26  
27  
28  
29  
30  
31  
32  
33  
34  
35  
36  
37  
38  
39  
40  
41  
42  
43  
44  
45  
46  
47  
48  
49  
50  
51  
52  
53  
54  
55  
56  
57  
58  
59  
60

## ARTICLE SUMMARY

### Strengths and limitations of this study

- This multicentre study examined usual clinical practice across a large number of hospitals in the National Health Service in England and Wales, representing the largest study of complicated peptic ulcer disease yet reported in the United Kingdom.
- Structured data was collected prospectively, mitigating against bias associated with retrospective study design.
- However, case ascertainment within the entire National Emergency Laparotomy Audit patient cohort, the main dataset from which the current study data was extracted, was 83% and missing data may have introduced unknown biases into the study.

## INTRODUCTION

Surgical treatment of peptic ulcer disease (PUD) has changed markedly over recent years. Overall operative intervention has declined, with a substantial fall in elective procedures such as gastric resection, vagotomy and pyloroplasty[1–3]. The role of surgery is now largely restricted to the emergency setting, for management of the complications of PUD[4]. Surgical repair is the treatment of choice for perforated PUD and is a second- or third-line treatment for bleeding ulcers that cannot be managed by endoscopic and/or radiological means. Earlier studies and nationwide audits show postoperative mortality following emergency surgery for perforated or bleeding ulcers to range from 9.1% to 26.5% although data from contemporary UK practice is lacking[2,5–8].

The National Emergency Laparotomy Audit (NELA) is a mandatory audit that captures rich data about the care of patients undergoing a range of emergency bowel operations in England and Wales. NELA was established in 2012 and is run by the Royal College of Anaesthetists, in collaboration with the Clinical Effectiveness Unit at the Royal College of Surgeons of England. The audit aims to improve the quality of care for patients undergoing emergency laparotomy, by collecting information on patients, the processes of care they receive and their short-term outcomes. These data are fed back locally, as well as being analysed nationally, and compared against accepted audit standards. To date, there have been three audit reports, most recently documenting a 30-day post-operative mortality rate of 10.6% (95% confidence intervals (CI) 10.2% – 11.0%) and a median length of stay of 11 days across the range of patients and conditions included[9–11].

The present study aimed to use NELA data to identify patients undergoing surgery for perforated or bleeding PUD, to describe the latest management and short-term outcomes for these patients. The study also explored factors that may be associated with mortality after surgery for perforated PUD.

1  
2  
3 A thorough appraisal of current practice is critical for benchmarking performance, and appropriately  
4  
5 directing future research and quality improvement.  
6  
7  
8  
9  
10  
11  
12  
13  
14  
15  
16  
17  
18  
19  
20  
21  
22  
23  
24  
25  
26  
27  
28  
29  
30  
31  
32  
33  
34  
35  
36  
37  
38  
39  
40  
41  
42  
43  
44  
45  
46  
47  
48  
49  
50  
51  
52  
53  
54  
55  
56  
57  
58  
59  
60

For peer review only

## METHODS

The NELA database contains information collected at the level of individual operations for patients, covering details of the admission, pre-operative management and risk-stratification, intra-operative details, post-operative risk and patient outcomes. From this database, patients aged 18 years or over undergoing 'Peptic ulcer – suture or repair of perforation' or 'Peptic ulcer – oversew of bleed' as their first, main surgical procedure after admission, between 1<sup>st</sup> December 2013 and 30<sup>th</sup> November 2015, were selected for inclusion. Re-operations and patients undergoing 'Gastric surgery – other', which is likely to have included formal surgical resection, were excluded. Data for the first and second years of the study were extracted on 1<sup>st</sup> February in 2015 and 2016, respectively. Data on age, sex, American Society of Anesthesiologists (ASA) score, pre-operative heart rate (HR), pre-operative systolic blood pressure (SBP), pre-operative predicted mortality (P-POSSUM)[12] and morbidity (POSSUM) were extracted[13]. NELA specifies recording of HR and SBP values closest to the time of booking the patient for theatre. Pre-operative care details, including the use of Computed Tomography (CT), time from admission to operation, time from admission to decision to operate, time from decision to operate to operation, and time from admission to antibiotics were also recorded. Information on the grade of most senior operating surgeon and surgical approach (open or minimal access), as well as intra-operative findings (extent and type of peritoneal contamination, see supplementary table 1), were examined, along with the immediate postoperative level of care (ward, level 2 or high dependency unit (HDU), and level 3 or intensive care unit (ICU)) and hospital procedure volume. The following outcomes were examined: total length of stay in an enhanced care setting (HDU or ITU); total postoperative length of stay; return to theatre; and in-hospital death within 60 days of the primary operative procedure.

### Statistical analysis

1  
2  
3 Patients were grouped and analysed separately according to presentation with perforation or  
4  
5 bleeding secondary to PUD. Continuous data were described using mean and standard deviation or  
6  
7 median and interquartile range if skewed, and category data were summarised as number and  
8  
9 percentage. Length of stay was summarised using survival methods with deaths prior to discharge  
10  
11 treated as censored observations.  
12

13  
14  
15 For the exploratory analysis of patients with perforated PUD, associations between patient, care and  
16  
17 operative factors and mortality were examined using multilevel logistic regression, with hospital  
18  
19 fitted as random effect. For this analysis alone, only patients undergoing surgery for perforation  
20  
21 within 48 hours of admission to hospital were included. This was designed to exclude patients who  
22  
23 developed a perforation during their admission, and patients undergoing surgery after an  
24  
25 unsuccessful period of non-operative management. Such patients may represent a different  
26  
27 population with a different risk profile. For example, severely comorbid patients with mild clinical  
28  
29 signs may preferentially be selected for initial non-operative management. The following variables  
30  
31 were selected for exploration by consensus within the working group before analysis: age; sex; ASA;  
32  
33 HR; SBP; pre-operative CT; time from admission to operation; grade of senior operating surgeon;  
34  
35 operative approach; peritoneal contamination type; peritoneal contamination extent; and post-  
36  
37 operative care level. Variables with many categories were grouped for analysis (see supplementary  
38  
39 table 1). Fractional polynomials were used to describe the relationship between continuous  
40  
41 variables and mortality (supplementary table 2). Data that was clearly incorrect was recoded as  
42  
43 missing. The analysis was restricted to cases with complete data for the variables of interest. All  
44  
45 variables were included in the model and not selected based on statistical significance. All analysis  
46  
47 was conducted using Stata 14.0 (StataCorp, College Station, TX).  
48  
49  
50  
51  
52  
53  
54

## 55 **Ethics**

56  
57  
58  
59  
60

1  
2  
3  
4  
5 NELA has approval from the Health Research Authority's Confidentiality Advisory Group for 'Use of  
6  
7 Patient Identifiable Information without Consent' (Section 251 of NHS Act 2006 and Health Service  
8  
9 (Control of Patient Information) Regulations 2002). The present analysis was performed under  
10  
11 NELA's remit to understand and inform the delivery of care to patients undergoing emergency  
12  
13 laparotomy. The data extract included anonymised patient level data. Therefore, further approval by  
14  
15 a research ethics committee was not required. Participating Trusts follow local governance  
16  
17 arrangements for audit registration. Patient data are uploaded via an encrypted website to a secure  
18  
19 server. Access is carefully restricted and data used in accordance with the Caldicott principles[14].  
20  
21  
22  
23

#### 24 **Patient involvement**

25  
26  
27  
28 Patients were not involved in any aspect of the design or conduct of this study.  
29  
30  
31  
32  
33  
34  
35  
36  
37  
38  
39  
40  
41  
42  
43  
44  
45  
46  
47  
48  
49  
50  
51  
52  
53  
54  
55  
56  
57  
58  
59  
60



## RESULTS

### Patient characteristics and hospital volume

During the study period, 43 321 emergency laparotomies were identified at 192 hospitals in England and Wales. Data on 2444 (5.5%) perforated peptic ulcers and 382 (0.9%) bleeding ulcers were retrieved from 186 (96.9%) contributing hospitals. Patient characteristics are shown in table 1. Over the two-year period, the median number of cases per hospital was 12 (IQR 7-17) and 2 (IQR 1-3) for perforated and bleeding ulcers, respectively.

Table 1. Pre-operative details of patients undergoing surgery for perforation or bleeding.

|                                |         | Perforation<br>n=2444 (%) |        | Bleed<br>n=382 (%) |        | All PUD<br>n=2826 (%) |        |
|--------------------------------|---------|---------------------------|--------|--------------------|--------|-----------------------|--------|
| Age in years (mean (SD))       | Mean    | 57.8                      | (19.4) | 65.0               | (16.3) | 58.8                  | (19.2) |
| Sex                            | Male    | 1450                      | (59.3) | 240                | (62.8) | 1690                  | (59.8) |
| ASA                            | 1       | 569                       | (23.3) | 30                 | (7.9)  | 599                   | (21.2) |
|                                | 2       | 738                       | (30.2) | 64                 | (16.8) | 802                   | (28.4) |
|                                | 3       | 611                       | (25.0) | 98                 | (25.7) | 709                   | (25.1) |
|                                | 4       | 461                       | (18.9) | 158                | (41.4) | 619                   | (21.9) |
|                                | 5       | 65                        | (2.7)  | 32                 | (8.4)  | 97                    | (3.4)  |
| Pre-op heart rate              | <80     | 449                       | (18.6) | 47                 | (12.5) | 496                   | (17.8) |
|                                | 80-99   | 928                       | (38.4) | 140                | (37.1) | 1068                  | (38.2) |
|                                | 100-119 | 704                       | (29.1) | 109                | (28.9) | 813                   | (29.1) |
|                                | 120-139 | 267                       | (11.0) | 65                 | (17.2) | 332                   | (11.9) |
|                                | ≥140    | 69                        | (2.9)  | 16                 | (4.2)  | 85                    | (3.0)  |
| Pre-op systolic blood pressure | <80     | 63                        | (2.6)  | 37                 | (11.6) | 100                   | (3.6)  |
|                                | 80-99   | 260                       | (10.8) | 96                 | (30.1) | 356                   | (12.8) |
|                                | 100-119 | 670                       | (27.8) | 118                | (37.0) | 788                   | (28.3) |
|                                | 120-139 | 831                       | (34.5) | 68                 | (21.3) | 899                   | (32.3) |
|                                | 140-159 | 429                       | (17.8) | 43                 | (11.4) | 472                   | (16.9) |
| Predicted mortality (P-POSSUM) | ≥160    | 157                       | (6.5)  | 15                 | (4.0)  | 172                   | (6.2)  |
|                                | <5%     | 935                       | (38.3) | 49                 | (12.8) | 984                   | (34.8) |
|                                | 5-9%    | 416                       | (17.0) | 37                 | (9.7)  | 453                   | (16.0) |
|                                | 10-24%  | 445                       | (18.2) | 74                 | (19.4) | 519                   | (18.4) |
|                                | 25-49%  | 292                       | (11.9) | 83                 | (21.7) | 375                   | (13.3) |
| Predicted morbidity (POSSUM)   | ≥50%    | 356                       | (14.6) | 139                | (36.4) | 495                   | (17.5) |
|                                | <25%    | 54                        | (2.2)  | 2                  | (0.5)  | 56                    | (2.0)  |
|                                | 25-49%  | 385                       | (15.8) | 16                 | (4.2)  | 401                   | (14.2) |
|                                | 50-74%  | 747                       | (30.6) | 53                 | (13.9) | 800                   | (28.3) |
|                                | ≥75%    | 1258                      | (51.5) | 311                | (81.4) | 1569                  | (55.5) |

SD – standard deviation; PUD – peptic ulcer disease; ASA – American Society of Anesthesiology

score; P-POSSUM – Portsmouth-POSSUM; POSSUM – Physiological and Operative Severity Score for the enUmeration of Mortality and morbidity.

## Pre-operative care

Pre-operative imaging differed according to diagnosis, with the majority (1792 / 2444, 73.3%) of patients undergoing treatment for perforated ulcers receiving a pre-operative CT scan (table 2), compared with 101 / 382 (26.4%) of patients with a bleeding ulcer.

Table 2. Details of pre-operative care of patients undergoing surgery for perforation or bleeding.

|                                 |                                  | Perforation |            | Bleed |             | All PUD |            |
|---------------------------------|----------------------------------|-------------|------------|-------|-------------|---------|------------|
|                                 |                                  | n=2444      | (%)        | n=382 | (%)         | n=2826  | (%)        |
| Pre-operative CT                | Yes                              | 1792        | (74.1)     | 101   | (26.8)      | 1893    | (67.7)     |
|                                 | No                               | 626         | (25.9)     | 276   | (73.2)      | 902     | (32.3)     |
| Time in hours<br>(median (IQR)) | Admission to operation           | 8.8         | (5.3-18.9) | 30.4  | (9.4-107.8) | 9.7     | (5.5-23.4) |
|                                 | Admission to decision to operate | 6.0         | (3.1-14.6) | 29.3  | (7.5-119.3) | 6.5     | (3.3-19.4) |
|                                 | Decision to operate to operation | 2.0         | (1.2-3.4)  | 1.1   | (0.5-2.1)   | 1.9     | (1.1-3.2)  |
|                                 | Admission to first antibiotics   | 4.6         | (2.1-10.1) | 11.8  | (3.8-47.8)  | 5.0     | (2.3-11.9) |

IQR – interquartile range; PUD – peptic ulcer disease; CT – computed tomography scan.

Median interval from admission to surgery was 8.8 hours (IQR 5.3 – 18.9) in patients with a perforated ulcer, and 30.4 hours (IQR 9.4 – 107.8) in those with a bleeding ulcer. Median interval from decision to operate to surgery was 2.0 (IQR 1.2 – 3.4) and 1.1 (IQR 0.5 – 2.1) hours in patients with perforations and bleeding ulcers, respectively. Patients admitted with a perforated ulcer received their first dose of antibiotics at a median of 4.6 (IQR 2.1 – 10.1; data recorded for 2085 / 2444 (85.3%) of patients) hours after admission, and those undergoing surgery for bleeding ulcers received antibiotics at a median of 11.8 hours (IQR 3.8 – 47.8; data for 273 / 382 (71.5%) of patients).

## Operative details and postoperative care level

Consultants were recorded as the senior surgeon in the majority of cases and most surgery was performed via the open approach (table 3). However, 489 / 2 444 (20.0%) patients underwent some

form of laparoscopic surgery for their perforated ulcer, with 320 (13.1%) procedures completed laparoscopically. The nature and extent of peritoneal contamination differed according to the clinical problem. The majority of patients with perforated ulcers had significant contamination affecting multiple quadrants.

Table 3. Operative details and postoperative destination for patients undergoing surgery for perforation or bleeding.

|                          |                                   |                   | Perforation |        | Bleed  |        | All PUD |        |
|--------------------------|-----------------------------------|-------------------|-------------|--------|--------|--------|---------|--------|
|                          |                                   |                   | n=2444      | (%)    | n=382  | (%)    | n=2826  | (%)    |
| Operation                | Senior surgeon                    | Consultant        | 1763        | (72.1) | 347    | (90.1) | 2110    | (74.7) |
|                          |                                   | Specialty trainee | 453         | (18.5) | 27     | (7.1)  | 480     | (17.0) |
|                          |                                   | Other             | 228         | (9.3)  | 8      | (2.1)  | 236     | (8.4)  |
| Approach                 | Open                              | 1955              | (80.0)      | 367    | (96.1) | 2322   | (82.2)  |        |
|                          | Laparoscopic (including assisted) | 320               | (13.1)      | 10     | (2.6)  | 330    | (11.7)  |        |
|                          | Laparoscopic converted            | 169               | (6.9)       | 5      | (1.3)  | 174    | (6.2)   |        |
| Contamination type       | None / minimal                    | 425               | (17.4)      | 250    | (65.4) | 675    | (23.9)  |        |
|                          | Significant                       | 2019              | (82.6)      | 132    | (34.6) | 2151   | (76.1)  |        |
| Contamination extent     | None / single quadrant            | 753               | (30.8)      | 319    | (83.5) | 1072   | (37.9)  |        |
|                          | Multiple quadrants                | 1691              | (69.2)      | 63     | (16.5) | 1754   | (62.1)  |        |
| Postoperative care level | Ward (level 1)                    | 1015              | (41.5)      | 68     | (17.8) | 1083   | (38.4)  |        |
|                          | HDU (level 2)                     | 652               | (26.7)      | 99     | (25.9) | 751    | (26.6)  |        |
|                          | ITU (level 3)                     | 774               | (31.7)      | 212    | (55.5) | 986    | (35.0)  |        |

PUD – peptic ulcer disease; HDU – high dependency unit; ITU – intensive therapy unit.

Most patients who underwent surgery to repair a perforated ulcer (1426 / 2444, 58.3%) were transferred to a HDU or ITU environment, with the remainder being transferred to a ward. A much higher proportion of patients operated on for bleeding went to HDU or ITU after surgery (311 / 382, 81.4%).

## Outcomes

Among patients transferred to HDU or ITU, the median postoperative stay in an enhanced care environment was 4 days for both groups (table 4). The median total postoperative stay was 8.4 days for patients treated for a perforated ulcer, compared with a longer median stay of 15.0 days for

bleeding ulcers. The rate of return to theatre was lower among patients operated on for perforation (136 / 2 444, 5.6%) than after surgery for bleeding (36 / 382, 9.4%). In each group, three patients died in theatre. The overall, 60-day in-hospital mortality was 287 / 2 444 (11.7%, 95% CI 10.5% – 13.1%) after surgery for a perforated ulcer, and 68 / 382 (17.8%, 95% CI 14.1% – 22.0%) after oversew of a bleeding ulcer.

Table 4. Outcomes of patients undergoing surgery for perforation or bleeding.

|                                      |                   | Perforation<br>n=2 444 |            | Bleed<br>n=382 |            | All PUD<br>n=2826 |            |
|--------------------------------------|-------------------|------------------------|------------|----------------|------------|-------------------|------------|
|                                      |                   |                        | (%)        |                | (%)        |                   | (%)        |
| Length of stay (days)                |                   |                        |            |                |            |                   |            |
| HDU/ITU                              | Median (IQR)      | 4.0                    | (2.0-7.0)  | 4.0            | (2.0-8.0)  | 4.0               | (2.0-7.0)  |
| Total                                | Median (IQR)      | 8.4                    | (5.2-18.4) | 15.0           | (7.5-29.0) | 9.2               | (5.4-20.0) |
| Return to theatre                    |                   | 136                    | (5.6)      | 36             | (9.4)      | 172               | (6.1)      |
| Mortality in-hospital within 60 days |                   | 287                    | (11.7)     | 68             | (17.8)     | 355               | (12.6)     |
|                                      | (Died in theatre) | 3                      | (0.1)      | 3              | (0.8)      | 6                 | (0.2)      |

IQR – interquartile range; PUD – peptic ulcer disease; HDU – high dependency unit; ITU – intensive therapy unit.

### Exploratory analysis

Of 2 327 patients where time from admission to operation was recorded, 2 231 (96.1%) underwent surgery for perforation in the first 48 hours after admission. Complete data for regression analysis were available for 2 162 (96.7%) of these patients. Variables identified as significantly associated with in-hospital 60-day mortality (after accounting for other variables) were age, ASA, pre-operative SBP and post-operative care level (table 5). For each increasing year of age, the risk of death rose by 5.0% (95% CI 3.5% – 6.5%), meaning that an increase of 10 years of age was associated with increased risk of death of 63.3% (95% CI 41.6% – 88.4%). An ASA score of 4 or 5 was associated with a markedly elevated risk of fatal outcome compared to an ASA of 1. There was also an increased risk of death for patients going to HDU or ITU compared to those transferred directly to a ward. The association between pre-operative SBP and postoperative mortality was non-linear (illustrated in fig 1). Extremes of low or high SBP were associated with increased risk of death. There was no

1  
2  
3 statistically significant association observed between patient sex, pre-operative HR, use of pre-  
4  
5 operative CT, time from admission to operation, operating surgeon, operative approach, intra-  
6  
7 operative contamination type or extent and subsequent in-hospital mortality.  
8  
9

10  
11 Table 5. Multilevel logistic regression results, examining factors associated with 60-day in-hospital  
12  
13 mortality after surgery for perforation; analysis restricted to patients undergoing surgery within 48  
14  
15 hours of admission.  
16

|                                             |                              | Odds ratio | 95% confidence intervals |       | p-value |
|---------------------------------------------|------------------------------|------------|--------------------------|-------|---------|
|                                             |                              |            | Lower                    | Upper |         |
| Age (per year)                              |                              | 1.05       | 1.04                     | 1.07  | <0.001  |
| Sex                                         | Male                         | 1.00       |                          |       |         |
|                                             | Female                       | 1.00       | 0.70                     | 1.42  | 0.999   |
| ASA                                         | 1                            | 1.00       |                          |       | <0.001  |
|                                             | 2                            | 0.77       | 0.26                     | 2.26  |         |
|                                             | 3                            | 2.10       | 0.77                     | 5.76  |         |
|                                             | 4 & 5                        | 7.19       | 2.62                     | 19.73 |         |
| Pre-op heart rate (per 10 bpm)              |                              | 1.03       | 0.95                     | 1.11  | 0.529   |
| Pre-op systolic blood pressure*             |                              |            |                          |       | <0.001  |
| Pre-op CT                                   | No                           | 1.00       |                          |       |         |
|                                             | Yes                          | 1.41       | 0.90                     | 2.22  | 0.133   |
| Time from admission to operation (per hour) |                              | 1.01       | 0.99                     | 1.02  | 0.392   |
| Operating surgeon                           | Consultant                   | 1.00       |                          |       |         |
|                                             | Non-consultant               | 0.90       | 0.57                     | 1.40  | 0.633   |
| Operative approach                          | Open                         | 1.00       |                          |       |         |
|                                             | Laparoscopic (inc. assisted) | 0.78       | 0.40                     | 1.50  | 0.459   |
| Contamination type                          | None / minimal               | 1.00       |                          |       |         |
|                                             | Significant                  | 0.88       | 0.49                     | 1.58  | 0.660   |
| Contamination extent                        | None / single quadrant       | 1.00       |                          |       |         |
|                                             | Multiple quadrants           | 1.14       | 0.70                     | 1.84  | 0.605   |
| Postoperative destination                   | Ward                         | 1.00       |                          |       |         |
|                                             | HDU or ITU                   | 2.22       | 1.20                     | 4.11  | 0.011   |

17  
18  
19  
20  
21  
22  
23  
24  
25  
26  
27  
28  
29  
30  
31  
32  
33  
34  
35  
36  
37  
38  
39  
40  
41  
42  
43  
44  
45  
46  
47  
48 \* - non-linear relationship; ASA – American Society of Anesthesiology score; CT – computed

49  
50 tomography scan; HDU – high dependency unit; ITU – intensive therapy unit.  
51  
52  
53  
54  
55  
56  
57  
58  
59  
60

## DISCUSSION

This is the first national study in the United Kingdom of complicated peptic ulcer disease requiring emergency surgery. Using two years of NELA data, we identified 2444 and 382 patients from 186 English and Welsh hospitals undergoing surgery for perforated or bleeding PUD. The post-operative in-hospital 60-day mortality rates were 11.7% and 17.8%, respectively. In exploratory analysis, mortality after repair of perforated ulcer was primarily associated with patient factors, rather than potentially modifiable aspects of the care provided. This may make it difficult to reduce mortality rates further. Average institutional surgical volume for bleeding ulcers was very low, and these patients had the highest mortality risk, highlighting the challenge and urgent need for further work to understand and improve outcomes in this group.

While mortality rates among the included patients were high, the reported results compare favourably with data from other research. Recent European studies have reported 90-day mortality rates from 19.2% - 29.8% after surgery for perforated PUD[5,15]. Among patients undergoing surgery for bleeding peptic ulcers, 30-day mortality rates were higher, ranging from 23.7% to 25.6%[7,16], with previous UK research revealing a 30% (CI 22% – 38%) post-operative mortality rate[17]. A recent large US study using American College of Surgeons National Surgical Quality Improvement Program data demonstrated similar rates to those observed in this study with 12.1% (CI 10.8% - 13.5%) and 18.6% (CI 15.9% - 21.5%) 30-day mortality after surgery for perforation and bleeding PUD respectively.

The exploratory analysis of factors associated with mortality after repair of perforation generated new, unexpected findings. The significant associations between age, ASA and preoperative SBP and post-operative mortality are unsurprising and consistent with previous research and risk prediction models[18–20]. Accurate and reproducible risk prediction to guide individual patient care would be

1  
2  
3 useful but has proven difficult. In this manuscript, our exploratory analysis was principally concerned  
4  
5 with a broad assessment of current practice and care provision. We were surprised to find a lack of  
6  
7 association between time from admission to surgery and mortality, and this disagrees with the  
8  
9 published literature. For example, Buck et al reported that after adjusting for prognostic variables,  
10  
11 each hour of surgical delay during the first 24 hours of admission was associated with a 2.4% (CI 1.1  
12  
13 – 3.7%) decrease in the probability of survival[21]. However, that study used less nuanced modelling  
14  
15 of continuous variables such as age or shock, which were reduced to dichotomous variables. In  
16  
17 addition, they did not describe any exclusion criteria based on time from admission to surgery,  
18  
19 raising the possibility that their cohort included patients undergoing surgery after failed conservative  
20  
21 management, and those developing a perforation during their hospital admission. The present lack  
22  
23 of association between time from admission to operation may have important clinical implications,  
24  
25 as it suggests that focusing efforts on reducing the interval from admission to operation may not be  
26  
27 the best way to reduce mortality rates. However, pre-operative blood pressure was associated with  
28  
29 subsequent mortality, and this is a potentially modifiable variable. Future research and quality  
30  
31 improvement should evaluate the role of preoperative optimisation, at the cost of a short delay in  
32  
33 transfer to the operating theatre, as a possible strategy to improve outcomes for patients who have  
34  
35 already experienced a perforation.  
36  
37

38  
39  
40 This study found that 13.1% of patients underwent surgical repair of their perforated ulcer via a  
41  
42 laparoscopic approach. A further 6.9% were converted from laparoscopic to open. Although the  
43  
44 reasons for conversion were not recorded, it is possible that some patients underwent an initial  
45  
46 diagnostic laparoscopy before proceeding directly to open repair once the diagnosis was made. A  
47  
48 smaller Danish study of 726 patients undergoing surgery for perforated PUD reported a laparoscopy  
49  
50 rate of 32.8%, with 24.5% converted from laparoscopic to open[22]. The lower rate in the present  
51  
52 study may represent under-reporting, as, anecdotally, some clinicians may not have considered a  
53  
54 laparoscopic suture repair eligible for a laparotomy audit. Future comparison with Hospital Episode  
55  
56  
57  
58  
59  
60

1  
2  
3 Statistics administrative data, available for all NHS activity, could test this hypothesis. Alternatively,  
4  
5 the lower rate may be a true reflection of practice, and lack of skills or confidence in performing  
6  
7 laparoscopic repair. The lack of association between operative approach and outcome may suggest  
8  
9 that patients are being treated laparoscopically on the availability of appropriately skilled surgeons,  
10  
11 rather than through careful case selection or 'picking winners'. Further and more detailed analysis is  
12  
13 warranted.  
14

15  
16  
17 This study has not defined clear ways to improve the survival of the patients included. It has,  
18  
19 however, identified aspects of the care provided that were not associated with mortality, suggesting  
20  
21 that these should not be the primary focus for immediate quality improvement. The results provide  
22  
23 no evidence that more rapid transfer to the operating theatre, greater consultant presence or  
24  
25 adoption of minimal access techniques would improve survival rates. However, preoperative SBP  
26  
27 may be an appropriate target for future research and quality improvement. Selection of patients for  
28  
29 postoperative care in the HDU or ITU environment, and other variables not analysed due to missing  
30  
31 data, such as time from admission to antibiotics, should also be investigated further.  
32  
33

34  
35  
36 The results highlight the low institutional volume for the included procedures, particularly for  
37  
38 bleeding PUD requiring surgery. Endoscopy is the first line investigation and treatment for upper  
39  
40 gastrointestinal bleeding, and previous large studies have demonstrated the high success rates of  
41  
42 endoscopic therapy for bleeding ulcers, with surgery required in 1.9-5.4% of cases[5,16,17]. National  
43  
44 guidance in the UK suggests interventional radiology and embolisation should be offered as second-  
45  
46 line treatment[23], but few hospitals have 24/7 access to this service. In 2014, 45% of services in  
47  
48 England did not have access to either local or networked interventional radiology out of hours[24]. It  
49  
50 is likely that many of the 101 of 382 (26.8%) patients with bleeding ulcers that underwent CT had CT  
51  
52 angiograms, though the specific details or preoperative CT are not collected in NELA. However, this  
53  
54 information would be useful in future updates to the NELA data template. When requiring surgery,  
55  
56  
57  
58  
59



1  
2  
3 patients with bleeding ulcers are high risk, as reflected in their ASA scores, with associated high  
4 levels of senior involvement in theatre. Low procedure volumes make it difficult to develop expertise  
5 managing these patients, which in turn may make it difficult to improve outcomes. In several surgical  
6 specialties, higher procedure volume has been associated with improved outcomes[25–27].  
7  
8 However, it is not clear whether such a volume-outcome relationship exists for emergency surgery  
9 for bleeding peptic ulcers and it may be difficult to centralise secondary treatment required for an  
10 unstable patient. Further research, using quantitative databases and case-studies in different  
11 centres, may determine future strategies to improve care for these patients.  
12  
13  
14  
15  
16  
17  
18  
19  
20  
21

22 This study has several strengths, as a nationwide prospective audit. However, there are limitations.  
23 Whilst participation is mandatory, case ascertainment was estimated at 83% in the first two years of  
24 the audit[9,10]. No eligible procedures were identified in 6 (3.1%) of hospitals participating in NELA.  
25 Patients with complicated PUD that were successfully managed without surgery are not included in  
26 NELA. Research in other areas has found that voluntary clinical databases typically demonstrate a  
27 lower mortality rate than population-based administrative data[28,29]. This may represent selection  
28 bias and it is possible that mortality rates across the country are higher than observed, further  
29 highlighting the need for more work in this area. In addition, deaths after discharge, or during the  
30 index admission but more than 60 days after the operative procedure, were not included. Another  
31 limitation is possible variation in coding of information, which depends upon how different  
32 observers interpret the terms. For example, coding of contamination in bleeding ulcers may have  
33 reflected existing contamination, or it may have reflected contamination due to the enterotomy  
34 required to visualise and treat the bleeding ulcer. It is not possible to retrospectively check the  
35 accuracy of such data, which must be taken at face value. While data completeness was satisfactory  
36 for the analysis presented, it is not possible to determine whether missing data introduced  
37 systematic bias. The extent of missing data precluded exploratory analysis of further variables of  
38 interest, such as time from admission to antibiotics, and time from admission to decision to operate.  
39  
40  
41  
42  
43  
44  
45  
46  
47  
48  
49  
50  
51  
52  
53  
54  
55  
56  
57  
58  
59  
60

1  
2  
3 While the results may be cautiously generalised to similar populations and healthcare systems,  
4  
5 differences in care organisation may limit broad applicability.  
6  
7

8  
9 In summary, this national study has demonstrated mortality rates within the NHS in England and  
10  
11 Wales that compare favourably with previously published international results. The overall rate of  
12  
13 mortality, however, remains high. Exploratory analysis suggested fatal outcome after surgery for  
14  
15 perforation was primarily associated with patient factors rather than the care provided, and this may  
16  
17 make further improvement difficult. As NELA accrues more data over the remaining years of the  
18  
19 project, it may be feasible to explore the association between other, modifiable care factors, such as  
20  
21 time to antibiotics, and clinical outcomes and this could aid further research. Surgical management  
22  
23 of bleeding PUD represents an area of practice with very low volume and high postoperative  
24  
25 mortality that mandates further investigation. Centralisation may be considered, though this could  
26  
27 be difficult due to the acuity of patients requiring surgery in this setting. Research using future audit  
28  
29 data may guide quality improvement efforts, to benefit patients requiring surgery for complications  
30  
31 of PUD.  
32  
33  
34  
35  
36  
37  
38  
39  
40  
41  
42  
43  
44  
45  
46  
47  
48  
49  
50  
51  
52  
53  
54  
55  
56  
57  
58  
59  
60

1  
2  
3 **FIGURE LEGEND**  
4  
5

6  
7 Fig 1. Illustration of non-linear relationship between pre-operative systolic blood pressure and 60-  
8  
9 day in-hospital mortality for patients undergoing surgery for perforation only.  
10  
11  
12  
13  
14  
15  
16  
17  
18  
19  
20  
21  
22  
23  
24  
25  
26  
27  
28  
29  
30  
31  
32  
33  
34  
35  
36  
37  
38  
39  
40  
41  
42  
43  
44  
45  
46  
47  
48  
49  
50  
51  
52  
53  
54  
55  
56  
57  
58  
59  
60

For peer review only

### **Acknowledgements**

The authors would like to thank the members of the NELA Project Team during the data collection period of this study: Mr Martin Cripps, Professor David Cromwell, Dr Emma Davies, Ms Sharon Drake, Dr Mike Galsworthy, Professor Mike Grocott, Dr Angela Kuryba, Mr Jose Lourtie, Dr Ramani Moonesinghe, Dr Dave Murray, Dr Matt Oliver, Mr Dimitri Papadimitriou, Dr Carol Peden, Dr Kate Walker.

### **Funding**

B E Byrne is an academic clinical fellow in surgery supported by the National Institute for Health Research (NIHR). J M Blazeby is a NIHR Senior Investigator. This work was undertaken with the support of the MRC ConDuCT-II (Collaboration and innovation for Difficult and Complex randomised controlled Trials In Invasive procedures) Hub for Trials Methodology Research (MR/K025643/1). The study was also supported by the NIHR Biomedical Research Centre at the University Hospitals Bristol NHS Foundation Trust and the University of Bristol. The views expressed are those of the authors and not necessarily those of the UK National Health Service, National Institute for Health Research, or the Department of Health. The National Emergency Laparotomy Audit is commissioned by the Healthcare Quality Improvement Partnership as part of the National Clinical Audit Programme on behalf of NHS England and the Welsh Government. The funders had no role in study design, data collection and analysis, decision to publish, or preparation of the manuscript.

### **Competing interests**

The authors have declared that no competing interests exist.

### Contributions

IDA, IB and JMB conceived the study. MB and IDA acquired the data. BEB, MB and CAR analysed the data. All authors interpreted the data. BEB drafted the manuscript. MB, CAR, IDA, IB and JMB critically revised the manuscript for important intellectual content. All authors approved the final version for publication.

### Data sharing

No additional data available.

### Previous presentation

Parts of this work have been presented at the Association of Surgeons of Great Britain and Ireland International Surgical Congress, Glasgow, May 2017, and at the Association of Upper Gastro-Intestinal Surgeons 20<sup>th</sup> Annual Scientific Meeting, Cork, September 2017.

## REFERENCES

- 1 Bashinskaya B, Nahed B V, Redjal N, *et al*. Trends in peptic ulcer disease and the identification of *Helicobacter Pylori* as a causative organism: population-based estimates from the US Nationwide Inpatient Sample. *J Glob Infect Dis* 2011;**3**:366–70.
- 2 Wang YR, Richter JE, Dempsey DT. Trends and outcomes of hospitalizations for peptic ulcer disease in the United States, 1993 to 2006. *Ann Surg* 2010;**251**:51–8.  
doi:10.1097/SLA.0b013e3181b975b8
- 3 Bardhan KD, Williamson M, Royston C, *et al*. Admission rates for peptic ulcer in the Trent Region, UK, 1972-2000. Changing pattern, a changing disease? *Dig Liver Dis* 2004;**36**:577–88.  
doi:10.1016/j.dld.2004.04.007
- 4 Paimela H, Oksala NKJ, Kivilaakso E. Surgery for peptic ulcer today: a study on the incidence, methods and mortality in surgery for peptic ulcer in Finland between 1987 and 1999. *Dig Surg* 2004;**21**:185–91. doi:10.1159/000079654
- 5 Lolle I, Møller MH, Rosenstock SJ. Association between ulcer site and outcome in complicated peptic ulcer disease: a Danish nationwide cohort study. *Scand J Gastroenterol* 2016;**51**:1165–71. doi:10.1080/00365521.2016.1190398
- 6 Lau JY, Sung J, Hill C, *et al*. Systematic review of the epidemiology of complicated peptic ulcer disease: incidence, recurrence, risk factors and mortality. *Digestion* 2011;**84**:102–13.  
doi:10.1159/000323958
- 7 Kyaw M, Tse Y, Ang D, *et al*. Embolization versus surgery for peptic ulcer bleeding after failed endoscopic hemostasis: a meta-analysis. *Endosc Int Open* 2014;**2**:E6–14. doi:10.1055/s-0034-1365235
- 8 Schroder VT, Pappas TN, Vaslef SN, *et al*. Vagotomy/Drainage is superior to local oversew in patients who require emergency surgery for bleeding peptic ulcers. *Ann Surg* 2014;**259**:1111–8. doi:10.1097/SLA.0000000000000386

- 1  
2  
3 9 NELA Project Team. The first patient report of the national emergency laparotomy audit.  
4  
5 2015.  
6  
7 10 NELA Project Team. The second patient report of the National Emergency Laparotomy Audit.  
8  
9 2016. <http://www.nela.org.uk/reports> (accessed 18 May 2017).  
10  
11 11 NELA Project Team. Third patient report of the National Emergency Laparotomy Audit. 2017.  
12  
13 12 Prytherch DR, Whiteley MS, Higgins B, *et al.* POSSUM and Portsmouth POSSUM for predicting  
14  
15 mortality. *Br J Surg* 1998;**85**:1217–20. doi:10.1046/j.1365-2168.1998.00840.x  
16  
17 13 Copeland GP, Jones D, Walters M. POSSUM: a scoring system for surgical audit. *Br J Surg*  
18  
19 1991;**78**:355–60. doi:10.1002/bjs.1800780327  
20  
21 14 NELA Project Team. Information governance procedures for NELA.  
22  
23 [http://nela.org.uk/download.php?fn=Information Governance Procedures for](http://nela.org.uk/download.php?fn=Information+Governance+Procedures+for+NELA.pdf&mime=application/pdf&pureFn=Information+Governance+Procedures+for+NELA.pdf)  
24  
25 NELA.pdf&mime=application/pdf&pureFn=Information Governance Procedures for NELA.pdf  
26  
27 (accessed 18 May 2017).  
28  
29 15 Thorsen K, Søreide JA, Søreide K. Long-term mortality in patients operated for perforated  
30  
31 peptic ulcer: factors limiting longevity are dominated by older age, comorbidity burden and  
32  
33 severe postoperative complications. *World J Surg* 2017;**41**:410–8. doi:10.1007/s00268-016-  
34  
35 3747-z  
36  
37 16 Nykänen T, Peltola E, Kylänpää L, *et al.* Bleeding gastric and duodenal ulcers: case-control  
38  
39 study comparing angioembolization and surgery. *Scand J Gastroenterol* 2017;**52**:523–30.  
40  
41 doi:10.1080/00365521.2017.1288756  
42  
43 17 Hearnshaw SA, Logan RFA, Lowe D, *et al.* Acute upper gastrointestinal bleeding in the UK:  
44  
45 patient characteristics, diagnoses and outcomes in the 2007 UK audit. *Gut* 2011;**60**:1327–35.  
46  
47 doi:10.1136/gut.2010.228437  
48  
49 18 Møller MH, Adamsen S, Thomsen RW, *et al.* Preoperative prognostic factors for mortality in  
50  
51 peptic ulcer perforation: A systematic review. *Scand J Gastroenterol* 2010;**45**:785–805.  
52  
53 doi:10.3109/00365521003783320  
54  
55  
56  
57  
58  
59  
60

- 1  
2  
3 19 Søreide K, Thorsen K, Harrison EM, *et al.* Perforated peptic ulcer. *Lancet* 2015;**386**:1288–98.  
4  
5 doi:10.1016/S0140-6736(15)00276-7  
6  
7 20 Møller MH, Engebjerg MC, Adamsen S, *et al.* The Peptic Ulcer Perforation (PULP) score: a  
8  
9 predictor of mortality following peptic ulcer perforation. A cohort. *Acta Anaesthesiol Scand*  
10  
11 2012;**56**:655–62. doi:10.1111/j.1399-6576.2011.02609.x  
12  
13 21 Buck DL, Vester-Andersen M, Møller MH. Surgical delay is a critical determinant of survival in  
14  
15 perforated peptic ulcer. *Br J Surg* 2013;**100**:1045–9. doi:10.1002/bjs.9175  
16  
17 22 Wilhelmsen M, Møller MH, Rosenstock S. Surgical complications after open and laparoscopic  
18  
19 surgery for perforated peptic ulcer in a nationwide cohort. *Br J Surg* 2015;**102**:382–7.  
20  
21 doi:10.1002/bjs.9753  
22  
23 23 National Institute For Health and Care Excellence. Acute upper gastrointestinal bleeding in  
24  
25 over 16s: management. 2012. [https://www.nice.org.uk/guidance/cg141/resources/acute-](https://www.nice.org.uk/guidance/cg141/resources/acute-upper-gastrointestinal-bleeding-in-over-16s-management-pdf-35109565796293)  
26  
27 [upper-gastrointestinal-bleeding-in-over-16s-management-pdf-35109565796293](https://www.nice.org.uk/guidance/cg141/resources/acute-upper-gastrointestinal-bleeding-in-over-16s-management-pdf-35109565796293)  
28  
29  
30 24 Royal College of Radiologists and British Society of Interventional Radiologists. Investing in  
31  
32 the interventional radiology workforce: the quality and efficiency case. London: 2014.  
33  
34 25 Birkmeyer JD, Stukel T a, Siewers AE, *et al.* Surgeon volume and operative mortality in the  
35  
36 United States. *N Engl J Med* 2003;**349**:2117–27. doi:10.1056/NEJMsa035205  
37  
38 26 Markar SR, Karthikesalingam A, Thrumurthy S, *et al.* Volume-outcome relationship in surgery  
39  
40 for esophageal malignancy: systematic review and meta-analysis 2000–2011. *J Gastrointest*  
41  
42 *Surg* 2012;**16**:1055–63. doi:10.1007/s11605-011-1731-3  
43  
44  
45 27 Pieper D, Mathes T, Neugebauer E, *et al.* State of evidence on the relationship between high-  
46  
47 volume hospitals and outcomes in surgery: a systematic review of systematic reviews. *J Am*  
48  
49 *Coll Surg* 2013;**216**:1015–25. doi:10.1016/j.jamcollsurg.2012.12.049  
50  
51 28 Almoudaris AM, Burns EM, Bottle A, *et al.* A colorectal perspective on voluntary submission  
52  
53 of outcome data to clinical registries. *Br J Surg* 2011;**98**:132–9. doi:10.1002/bjs.7301  
54  
55 29 Aylin P, Lees T, Baker S, *et al.* Descriptive study comparing routine hospital administrative  
56  
57  
58  
59



1  
2  
3 data with the Vascular Society of Great Britain and Ireland's National Vascular Database. *Eur J*  
4  
5 *Vasc Endovasc Surg* 2007;**33**:461–5. doi:10.1016/j.ejvs.2006.10.033  
6  
7  
8  
9  
10  
11  
12  
13  
14  
15  
16  
17  
18  
19  
20  
21  
22  
23  
24  
25  
26  
27  
28  
29  
30  
31  
32  
33  
34  
35  
36  
37  
38  
39  
40  
41  
42  
43  
44  
45  
46  
47  
48  
49  
50  
51  
52  
53  
54  
55  
56  
57  
58  
59  
60

For peer review only

1  
2  
3  
4  
5  
6  
7  
8  
9  
10  
11  
12  
13  
14  
15  
16  
17  
18  
19  
20  
21  
22  
23  
24  
25  
26  
27  
28  
29  
30  
31  
32  
33  
34  
35  
36  
37  
38  
39  
40  
41  
42  
43  
44  
45  
46  
47  
48  
49  
50  
51  
52  
53  
54  
55  
56  
57  
58  
59  
60

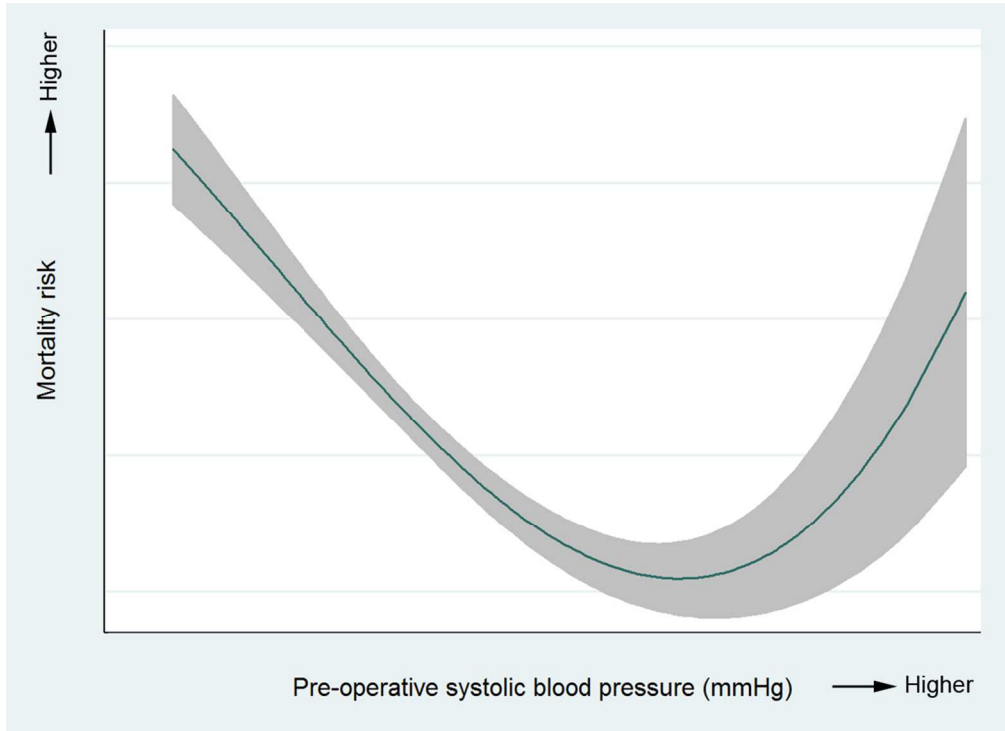

Illustration of non-linear relationship between pre-operative systolic blood pressure and 60-day in-hospital mortality for patients undergoing surgery for perforation only.

101x73mm (300 x 300 DPI)

1  
2  
3 **SUPPLEMENTARY MATERIAL**  
4  
5  
6  
7

8 Supplementary table 1. Grouping of categorical variables for analysis.  
9

| Variable                        | Group                  | Original values          |
|---------------------------------|------------------------|--------------------------|
| ASA                             | 1                      | 1                        |
|                                 | 2                      | 2                        |
|                                 | 3                      | 3                        |
|                                 | 4 & 5                  | 4                        |
|                                 |                        | 5                        |
| Peritoneal contamination type   | None / minimal         | None / serous            |
|                                 |                        | Gas / minimal            |
|                                 | Significant            | Pus                      |
|                                 |                        | Bile                     |
|                                 |                        | Gastro-duodenal contents |
|                                 |                        | Small bowel contents     |
|                                 |                        | Faeculent fluid          |
|                                 |                        | Faeces                   |
|                                 |                        | Blood                    |
|                                 |                        | None                     |
| Peritoneal contamination extent | None / single quadrant | Single quadrant          |
|                                 | Multiple quadrants     | Multiple quadrants       |
| Preoperative CT                 | No / missing           | No                       |
|                                 |                        | Missing                  |
| Senior operating surgeon grade  | Yes                    | Yes                      |
|                                 | Consultant             | Consultant               |
|                                 | Non-consultant         | Post CCT fellow          |
|                                 |                        | Specialty trainee        |
|                                 |                        | SAS doctor               |
|                                 |                        | Research/clinical fellow |
|                                 |                        | Core trainee             |
| Operative approach              | Open                   | Open                     |
|                                 |                        | Laparoscopic converted   |
|                                 | Minimal access         | Laparoscopic             |
|                                 |                        | Laparoscopic assisted    |
| Postoperative care level        | Ward                   | Ward                     |
|                                 | HDU or ITU             | Level 2                  |
|                                 |                        | Level 3                  |

49 ASA – American Society of Anesthesiology score; CT – computed tomography scan; CCT – certificate

50 of completion of training; SAS – specialty and associate specialist doctors.  
51  
52  
53  
54  
55  
56  
57  
58  
59  
60

Supplementary table 2. Relationships between independent variables and mortality.

| Variable                              | Modelling function                |
|---------------------------------------|-----------------------------------|
| Age                                   | Linear                            |
| Preoperative HR                       | Linear                            |
| Preoperative SBP                      | 2-term square and cube polynomial |
| Time admission to decision to operate | Linear                            |

HR – heart rate; SBP – systolic blood pressure.

For peer review only

**STROBE 2007 (v4) Statement—Checklist of items that should be included in reports of *cohort studies***

| Section/Topic            | Item # | Recommendation                                                                                                                                                                       | Reported on page # |
|--------------------------|--------|--------------------------------------------------------------------------------------------------------------------------------------------------------------------------------------|--------------------|
| Title and abstract       | 1      | (a) Indicate the study's design with a commonly used term in the title or the abstract                                                                                               | 1                  |
|                          |        | (b) Provide in the abstract an informative and balanced summary of what was done and what was found                                                                                  | 2-3                |
| <b>Introduction</b>      |        |                                                                                                                                                                                      |                    |
| Background/rationale     | 2      | Explain the scientific background and rationale for the investigation being reported                                                                                                 | 5-6                |
| Objectives               | 3      | State specific objectives, including any prespecified hypotheses                                                                                                                     | 5-6                |
| <b>Methods</b>           |        |                                                                                                                                                                                      |                    |
| Study design             | 4      | Present key elements of study design early in the paper                                                                                                                              | 7                  |
| Setting                  | 5      | Describe the setting, locations, and relevant dates, including periods of recruitment, exposure, follow-up, and data collection                                                      | 7                  |
| Participants             | 6      | (a) Give the eligibility criteria, and the sources and methods of selection of participants. Describe methods of follow-up                                                           | 7                  |
|                          |        | (b) For matched studies, give matching criteria and number of exposed and unexposed                                                                                                  | NA                 |
| Variables                | 7      | Clearly define all outcomes, exposures, predictors, potential confounders, and effect modifiers. Give diagnostic criteria, if applicable                                             | 7                  |
| Data sources/measurement | 8*     | For each variable of interest, give sources of data and details of methods of assessment (measurement). Describe comparability of assessment methods if there is more than one group | 7                  |
| Bias                     | 9      | Describe any efforts to address potential sources of bias                                                                                                                            | NA                 |
| Study size               | 10     | Explain how the study size was arrived at                                                                                                                                            | NA                 |
| Quantitative variables   | 11     | Explain how quantitative variables were handled in the analyses. If applicable, describe which groupings were chosen and why                                                         | 8                  |
| Statistical methods      | 12     | (a) Describe all statistical methods, including those used to control for confounding                                                                                                | 8                  |
|                          |        | (b) Describe any methods used to examine subgroups and interactions                                                                                                                  | 8                  |
|                          |        | (c) Explain how missing data were addressed                                                                                                                                          | 8                  |
|                          |        | (d) If applicable, explain how loss to follow-up was addressed                                                                                                                       | NA                 |
|                          |        | (e) Describe any sensitivity analyses                                                                                                                                                | NA                 |
| <b>Results</b>           |        |                                                                                                                                                                                      |                    |

|                          |     |                                                                                                                                                                                                              |       |
|--------------------------|-----|--------------------------------------------------------------------------------------------------------------------------------------------------------------------------------------------------------------|-------|
| Participants             | 13* | (a) Report numbers of individuals at each stage of study—eg numbers potentially eligible, examined for eligibility, confirmed eligible, included in the study, completing follow-up, and analysed            | 10    |
|                          |     | (b) Give reasons for non-participation at each stage                                                                                                                                                         | NA    |
|                          |     | (c) Consider use of a flow diagram                                                                                                                                                                           | NA    |
| Descriptive data         | 14* | (a) Give characteristics of study participants (eg demographic, clinical, social) and information on exposures and potential confounders                                                                     | 10-11 |
|                          |     | (b) Indicate number of participants with missing data for each variable of interest                                                                                                                          | 10-11 |
|                          |     | (c) Summarise follow-up time (eg, average and total amount)                                                                                                                                                  | 13    |
| Outcome data             | 15* | Report numbers of outcome events or summary measures over time                                                                                                                                               | 13    |
| Main results             | 16  | (a) Give unadjusted estimates and, if applicable, confounder-adjusted estimates and their precision (eg, 95% confidence interval). Make clear which confounders were adjusted for and why they were included | 13    |
|                          |     | (b) Report category boundaries when continuous variables were categorized                                                                                                                                    | NA    |
|                          |     | (c) If relevant, consider translating estimates of relative risk into absolute risk for a meaningful time period                                                                                             | NA    |
| Other analyses           | 17  | Report other analyses done—eg analyses of subgroups and interactions, and sensitivity analyses                                                                                                               | 13-14 |
| <b>Discussion</b>        |     |                                                                                                                                                                                                              |       |
| Key results              | 18  | Summarise key results with reference to study objectives                                                                                                                                                     | 15    |
| <b>Limitations</b>       |     |                                                                                                                                                                                                              |       |
| Interpretation           | 20  | Give a cautious overall interpretation of results considering objectives, limitations, multiplicity of analyses, results from similar studies, and other relevant evidence                                   | 15-19 |
| Generalisability         | 21  | Discuss the generalisability (external validity) of the study results                                                                                                                                        | 19    |
| <b>Other information</b> |     |                                                                                                                                                                                                              |       |
| Funding                  | 22  | Give the source of funding and the role of the funders for the present study and, if applicable, for the original study on which the present article is based                                                | 21    |

\*Give information separately for cases and controls in case-control studies and, if applicable, for exposed and unexposed groups in cohort and cross-sectional studies.

**Note:** An Explanation and Elaboration article discusses each checklist item and gives methodological background and published examples of transparent reporting. The STROBE checklist is best used in conjunction with this article (freely available on the Web sites of PLoS Medicine at <http://www.plosmedicine.org/>, Annals of Internal Medicine at <http://www.annals.org/>, and Epidemiology at <http://www.epidem.com/>). Information on the STROBE Initiative is available at [www.strobe-statement.org](http://www.strobe-statement.org).
