# Supplementary material for: Short-term outcomes after emergency surgery for complicated peptic ulcer disease from the UK National Emergency Laparotomy Audit: a cohort study
Source: PubMed Central journal article supplement (PMC6104767; doi:10.1136/bmjopen-2018-023721), 2018-08-20
Supplement: bmjopen-2018-023721supp001.pdf [file bmjopen-2018-023721supp001.pdf]

## SUPPLEMENTARY MATERIAL

Supplementary table 1. Grouping of categorical variables for analysis.

| Variable                        | Group                    | Original values          |                        |
|---------------------------------|--------------------------|--------------------------|------------------------|
| ASA                             | 1                        | 1                        |                        |
|                                 | 2                        | 2                        |                        |
|                                 | 3                        | 3                        |                        |
|                                 | 4 & 5                    | 4                        |                        |
|                                 |                          | 5                        |                        |
| Peritoneal contamination type   | None / minimal           | None / serous            |                        |
|                                 |                          | Gas / minimal            |                        |
|                                 | Significant              | Pus                      |                        |
|                                 |                          | Bile                     |                        |
|                                 |                          | Gastro-duodenal contents |                        |
|                                 |                          | Small bowel contents     |                        |
|                                 |                          | Faeculent fluid          |                        |
|                                 |                          | Faeces                   |                        |
|                                 |                          | Blood                    |                        |
|                                 |                          | None                     |                        |
| Peritoneal contamination extent | None / single quadrant   | Single quadrant          |                        |
|                                 | Multiple quadrants       | Multiple quadrants       |                        |
| Preoperative CT                 | No / missing             | No                       |                        |
|                                 |                          | Missing                  |                        |
| Senior operating surgeon grade  | Yes                      | Yes                      |                        |
|                                 | Consultant               | Consultant               |                        |
|                                 |                          | Post CCT fellow          |                        |
|                                 |                          | Specialty trainee        |                        |
|                                 |                          | SAS doctor               |                        |
| Non-consultant                  | Research/clinical fellow |                          |                        |
|                                 | Core trainee             |                          |                        |
|                                 | Other                    |                          |                        |
|                                 | Operative approach       | Open                     | Open                   |
|                                 |                          | Minimal access           | Laparoscopic converted |
| Laparoscopic                    |                          |                          |                        |
| Laparoscopic assisted           |                          |                          |                        |
| Postoperative care level        | Ward                     | Ward                     |                        |
|                                 | HDU or ITU               | Level 2                  |                        |
|                                 |                          | Level 3                  |                        |

ASA – American Society of Anesthesiology score; CT – computed tomography scan; CCT – certificate

of completion of training; SAS – specialty and associate specialist doctors.

Supplementary table 2. Relationships between independent variables and mortality.

| Variable                              | Modelling function                |
|---------------------------------------|-----------------------------------|
| Age                                   | Linear                            |
| Preoperative HR                       | Linear                            |
| Preoperative SBP                      | 2-term square and cube polynomial |
| Time admission to decision to operate | Linear                            |

HR – heart rate; SBP – systolic blood pressure.
